# Supplementary material for: Elucidating the exchange interactions in a {GdIIICuII4} propellor
Source: Royal Society of Chemistry journal article supplement (doi:10.1039/d2dt03901j), 2023-01-01
Supplement: d2dt03901j1.pdf [file d2dt03901j1.pdf]

## Supporting Information

### Contents

|                                                                                                                                                                                                                                                                                              |      |
|----------------------------------------------------------------------------------------------------------------------------------------------------------------------------------------------------------------------------------------------------------------------------------------------|------|
| <b>Table S1</b> Shape measures of {LnCu <sub>4</sub> } relative to ideal 8-vertex polyhedra shown of complexes [LnCu <sub>4</sub> (H <sub>4</sub> L) <sub>4</sub> ](Cl) <sub>2</sub> (ClO <sub>4</sub> )·6CH <sub>3</sub> OH (Gd <b>1</b> , Tb <b>2</b> , Dy <b>3</b> and La <b>4</b> )..... | i    |
| <b>Table S2</b> Summary of the average intramolecular distances between metal ions for complexes <b>1–4</b> .....                                                                                                                                                                            | ii   |
| <b>Table S3</b> Summary of magneto-structural parameters of <b>1–4</b> .....                                                                                                                                                                                                                 | ii   |
| <b>Table S4</b> Summary of temperature dependence of the calculated and experimental susceptibility values for <b>1–4</b> .....                                                                                                                                                              | ii   |
| <b>Figure S1</b> EDX spectra and elemental map performed in a bulk sample of <b>1</b> .....                                                                                                                                                                                                  | iii  |
| <b>Figure S2</b> Magnetisation vs. field at different temperatures for complexes <b>1–4</b> .....                                                                                                                                                                                            | iii  |
| <b>Figure S3</b> Field-sweep ac susceptibility measurements for <b>2</b> and <b>3</b> .....                                                                                                                                                                                                  | v    |
| <b>Figure S4</b> Ac dynamic measurements for <b>3</b> .....                                                                                                                                                                                                                                  | vi   |
| <b>Table S5</b> Table with the relaxation rate ( $\tau_0$ ) and the energy barrier ( $\Delta E_a/k_B$ ) parameters.....                                                                                                                                                                      | vi   |
| <b>Figure S5</b> Magnetic model and spin Hamiltonians used for the DFT calculations and the fit of <b>1</b> and <b>4</b> .....                                                                                                                                                               | vii  |
| <b>Table S6</b> Experimental values for distances, angles and magnetic exchange interaction based on previously reported {GdCu} systems.....                                                                                                                                                 | viii |
| <b>Figure S6</b> Dependence of the experimental $J$ values on {GdCu} systems with the torsion angle define by $\tau(\text{Cu-O-Gd-Cu})$ .....                                                                                                                                                | xi   |
| <b>Figure S7</b> Intermolecular interactions between Cu(Sbp) centres .....                                                                                                                                                                                                                   | xi   |
| <b>Figure S8</b> Intermolecular interactions between Cu(Sp) centres .....                                                                                                                                                                                                                    | xii  |
| <b>Table S7:</b> Calculated spin densities and corresponding energies for the computed spin distributions in systems <b>1</b> and <b>4</b> .....                                                                                                                                             | xii  |
| <b>Tables S8-11:</b> Bond lengths for systems <b>1-4</b> .....                                                                                                                                                                                                                               | xiii |
| <b>Tables S12-15:</b> Bond angles for systems <b>1-4</b> .....                                                                                                                                                                                                                               | xvii |
| <b>References</b> .....                                                                                                                                                                                                                                                                      | xxv  |

**Table S1** Shape measures of {LnCu<sub>4</sub>} relative to ideal 8-vertex polyhedra shown of complexes [LnCu<sub>4</sub>(H<sub>4</sub>L)<sub>4</sub>](Cl)<sub>2</sub>(ClO<sub>4</sub>)·6CH<sub>3</sub>OH (Gd **1**, Tb **2**, Dy **3** and La **4**). The lowest CShMs value, and thus most coincident geometry is highlighted in pink.<sup>[1]</sup>

|               | <b>1</b>     | <b>2</b>     | <b>3</b>     | <b>4</b>     | <b>Symmetry</b>              | <b>Ideal shape</b>                         |
|---------------|--------------|--------------|--------------|--------------|------------------------------|--------------------------------------------|
| OP-8          | 33.263       | 33.124       | 32.973       | 33.997       | <i>D</i> <sub>8h</sub>       | Octagon                                    |
| HPY-8         | 22.159       | 22.271       | 22.220       | 21.998       | <i>C</i> <sub>7v</sub>       | Heptagonal pyramid                         |
| HBPY-8        | 15.297       | 15.268       | 15.410       | 14.966       | <i>D</i> <sub>6h</sub>       | Hexagonal bipyramid                        |
| CU-8          | 7.811        | 7.740        | 7.914        | 7.482        | <i>O</i> <sub>h</sub>        | Cube                                       |
| <b>SAPR-8</b> | <b>1.125</b> | <b>1.081</b> | <b>1.060</b> | <b>1.371</b> | <b><i>D</i><sub>4d</sub></b> | <b>Square antiprism</b>                    |
| TDD-8         | 1.973        | 1.878        | 1.909        | 2.019        | <i>D</i> <sub>2d</sub>       | Triangular dodecahedron                    |
| JGBF-8        | 16.888       | 16.872       | 16.928       | 16.861       | <i>D</i> <sub>2d</sub>       | Johnson gyrobifastigium J26                |
| JETBPY-       | 28.557       | 28.696       | 28.476       | 28.315       | <i>D</i> <sub>3h</sub>       | Johnson elongated triangular bipyramid J14 |
| JBTPR-8       | 3.563        | 3.535        | 3.506        | 3.874        | <i>C</i> <sub>2v</sub>       | Biaugmented trigonal prism J50             |
| BTPR-8        | 3.020        | 2.952        | 2.930        | 3.259        | <i>C</i> <sub>2v</sub>       | Biaugmented trigonal prism                 |
| JSD-8         | 5.371        | 5.348        | 5.324        | 5.696        | <i>D</i> <sub>2d</sub>       | Snub diphenoid J84                         |
| TT-8          | 8.364        | 8.362        | 8.518        | 8.090        | <i>T</i> <sub>d</sub>        | Triakis tetrahedron                        |
| ETBPY-8       | 23.386       | 23.509       | 23.453       | 23.095       | <i>D</i> <sub>3h</sub>       | Elongated trigonal bipyramid               |

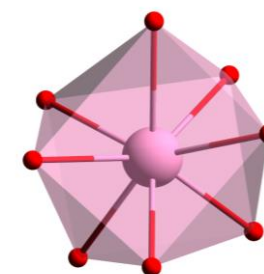

**Table S2** Summary of the average intramolecular distances between metal ions for complexes 1–4.

| Complex | $d_{\text{Avg}}^{\text{Cu1}\cdots\text{Cu2}}/\text{\AA}$ | $d_{\text{Avg}}^{\text{Cu}\cdots\text{Cu}'}/\text{\AA}$ | $d_{\text{(Cu1}\cdots\text{Ln1)}}/\text{\AA}$ | $d_{\text{(Cu2}\cdots\text{Ln1)}}/\text{\AA}$ |
|---------|----------------------------------------------------------|---------------------------------------------------------|-----------------------------------------------|-----------------------------------------------|
| 1 (Gd)  | 4.777(6)                                                 | 6.332(1)                                                | 3.250(2)                                      | 3.311(5)                                      |
| 2 (Tb)  | 4.766(7)                                                 | 6.318(7)                                                | 3.242(8)                                      | 3.304(7)                                      |
| 3 (Dy)  | 4.761(5)                                                 | 6.309(6)                                                | 3.242(3)                                      | 3.295(4)                                      |
| 4 (La)  | 4.874(6)                                                 | 6.471(6)                                                | 3.313(9)                                      | 3.383(9)                                      |

**Table S3** Summary of structural parameters of 1–4: geometry around the Cu(II) centres (Cu1, Cu2), Cu–O–Ln angles, Cu–O⋯O–Ln torsion angles, and dihedral angles ( $\alpha$ ). Note Sbp means square-based pyramidal geometry, and Sp means square-planar geometry.

| Complex | Atom | Coord. environment | Cu–O–Ln (°) | Cu–O⋯O–Ln (°) | $\alpha$ (°) |
|---------|------|--------------------|-------------|---------------|--------------|
| 1 (Gd)  | Cu1  | Sbp                | 94.3(9)     | 135.83(20)    | 44.17        |
|         | Cu2  | Sp                 | 101.07(10)  | 160.61(21)    | 19.39        |
| 2 (Tb)  | Cu1  | Sbp                | 94.5(6)     | 136.18(13)    | 43.81        |
|         | Cu2  | Sp                 | 101.16(6)   | 160.74(14)    | 18.97        |
| 3 (Dy)  | Cu1  | Sbp                | 94.75(7)    | 136.68(1)     | 43.28        |
|         | Cu2  | Sp                 | 101.45(7)   | 161.06(1)     | 18.53        |
| 4 (La)  | Cu1  | Sbp                | 93.95(6)    | 134.87(3)     | 45.13        |
|         | Cu2  | Sp                 | 100.75(6)   | 160.08(3)     | 19.92        |

**Table S4** Summary of the calculated ( $\chi_M T_{\text{cal}}$ ) and experimental ( $\chi_M T_{\text{exp}}$ ) susceptibility values for 1–4 (at room temperature).  $L$ ,  $S$ ,  $g_J$  and ground state (GS) term symbol are related to each lanthanide ion.

| Complex | $L$ | $S$ | $g_J$ | GS term symbol      | $\chi_M T_{\text{cal}} \{\text{LnCu}_4\}$<br>( $\text{cm}^3 \cdot \text{mol}^{-1} \cdot \text{K}$ ) | $\chi_M T_{\text{exp}} \{\text{LnCu}_4\}$<br>( $\text{cm}^3 \cdot \text{mol}^{-1} \cdot \text{K}$ ) |
|---------|-----|-----|-------|---------------------|-----------------------------------------------------------------------------------------------------|-----------------------------------------------------------------------------------------------------|
| 1 (Gd)  | 0   | 7/2 | 2     | $^8\text{S}_{7/2}$  | 9.54                                                                                                | 9.64                                                                                                |
| 2 (Tb)  | 3   | 3   | 3/2   | $^7\text{F}_6$      | 13.5                                                                                                | 13.5                                                                                                |
| 3 (Dy)  | 5   | 5/2 | 4/3   | $^6\text{H}_{15/2}$ | 15.8                                                                                                | 15.9                                                                                                |
| 4 (La)* | –   | –   | –     | –                   | 1.67                                                                                                | 1.73                                                                                                |

\*Lanthanum does not have any 4f electrons. Therefore  $\chi_M T_{\text{cal}} \{\text{LaCu}_4\}$  was calculated considering four isolated Cu(II) ions,  $S_{\text{Cu}} = 1/2$  and  $g_{\text{Cu}} = 2.11$ .

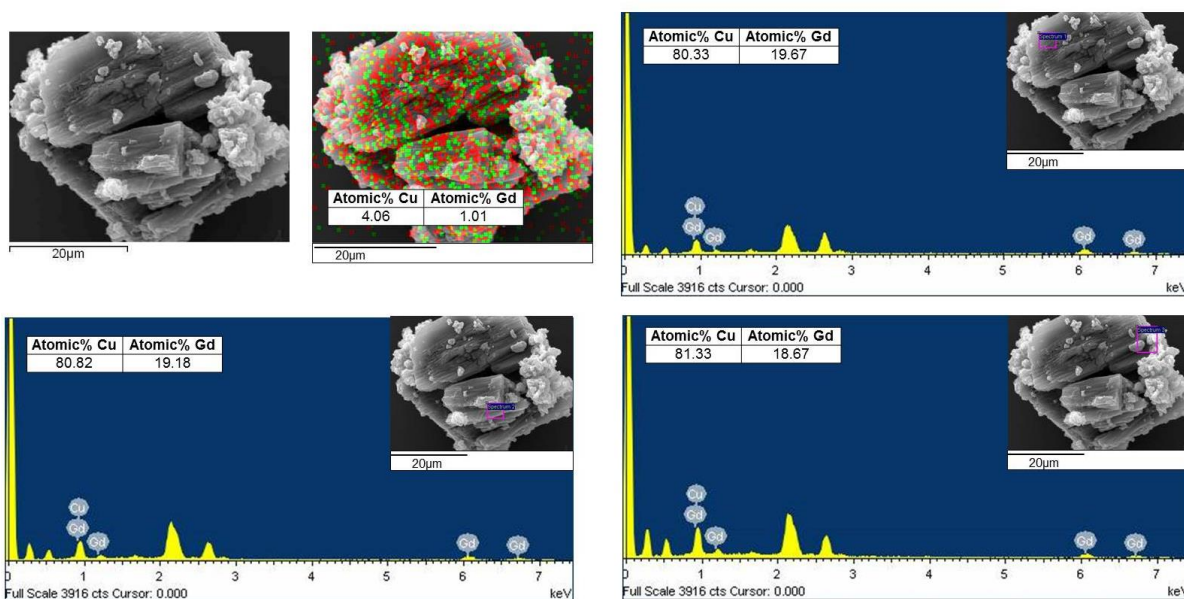

**Figure S1** EDX spectra and elemental map (Cu, red; Gd, green) showing the distribution of Gd and Cu in a bulk sample of **1**. The inset displays the area of the sample used for the analysis; the Atomic% is shown for each area.

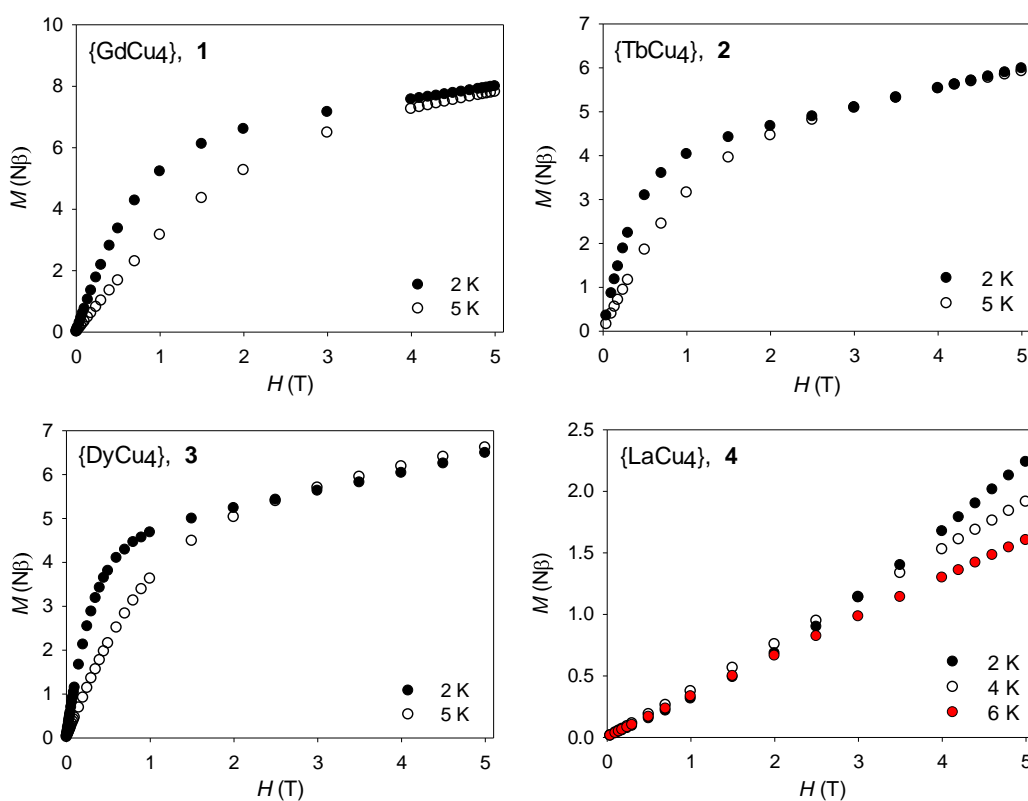

**Figure S2** Magnetisation vs field at different temperatures for complexes **1**, **2**, **3** (2 K, 5 K) and **4** (2 K, 4 K, 6 K).

### Ac susceptibility measurements of **2** and **3**

Studies were performed as a function of the frequency in the absence of dc field and under different applied fields, at 2 K (for **2** and **3**) and over the temperature range of 1.8–5 K (**3**). Compound **2** displays the onset of an out-of-phase  $\chi''$  signal in zero dc field, however, the signal is very weak, and no enhancement was observed despite the application of an external field (see dc field sweep experiments in Figure S3, left). On the other hand, compound **3** shows a promising stronger  $\chi''$  signal in zero dc field, which is improved under the influence of an external dc field (see Figure S3, right). The different dynamic properties between **2** and **3** arise due to the nature of the central Ln(III) ion. Dy(III) is a Kramers ion, therefore its ground state is well described as a doublet. In contrast Tb(III) is a non-Kramers ion, and thus its ground state depends on the axiality generated by crystal field effects. The effect of the dc field on **3** effectively improves the magnitude of the  $\chi''$  signal, but it was not possible to move the out-of-phase signal enough to see the maxima. The dynamics of **3** have been studied by the application of three different fields strengths,  $H_{dc} = 1000, 1500$  and  $2000$  Oe (see Figure S4). All the experiments show slow relaxation of the magnetisation. Given the lack of local  $\chi''$  maxima in the ac plots, the relaxation rate ( $\tau_0$ ) and the energy barrier ( $\Delta E/k_B$ ) parameters were calculated by using the Kramers-Kronig-derivate equation of the Arrhenius law  $\ln(\chi''/\chi') = \ln(\omega\tau_0) + \Delta E/k_B T$ . The fit of the experimental ac susceptibility gives the relaxation rates  $\tau_0 = 7.2 \cdot 10^{-7}$  s,  $7.4 \cdot 10^{-7}$  s and  $8.8 \cdot 10^{-7}$  s, and the energy barriers  $\Delta E/k_B = 9.7 \pm 0.2$  K,  $9.9 \pm 0.3$  K and  $9.8 \pm 0.3$  K for fields of 1000, 1500, and 2000 Oe, respectively (see Table S5). The calculated  $\tau_0$  and  $\Delta E/k_B$  values are reasonable compared to those reported for similar {LnCu} SMMs.

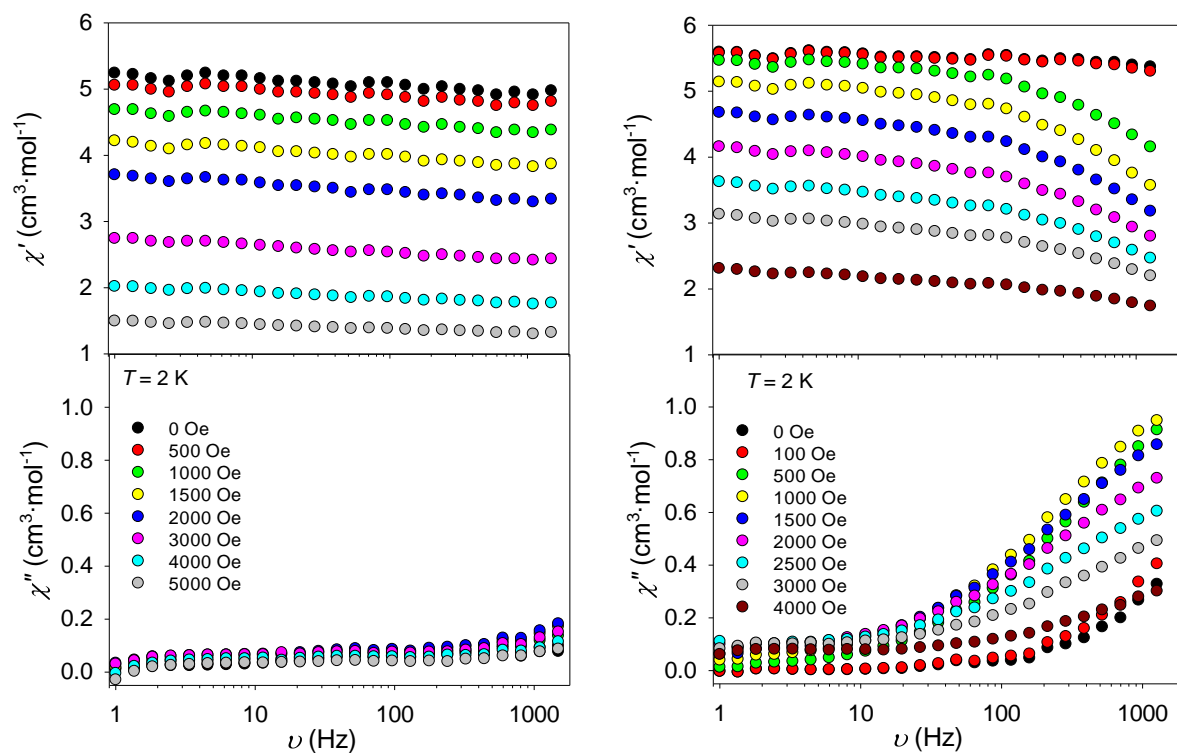

**Figure S3** Field-sweep ac susceptibility measurements for **2** (left) and **3** (right) at  $T = 2$  K.

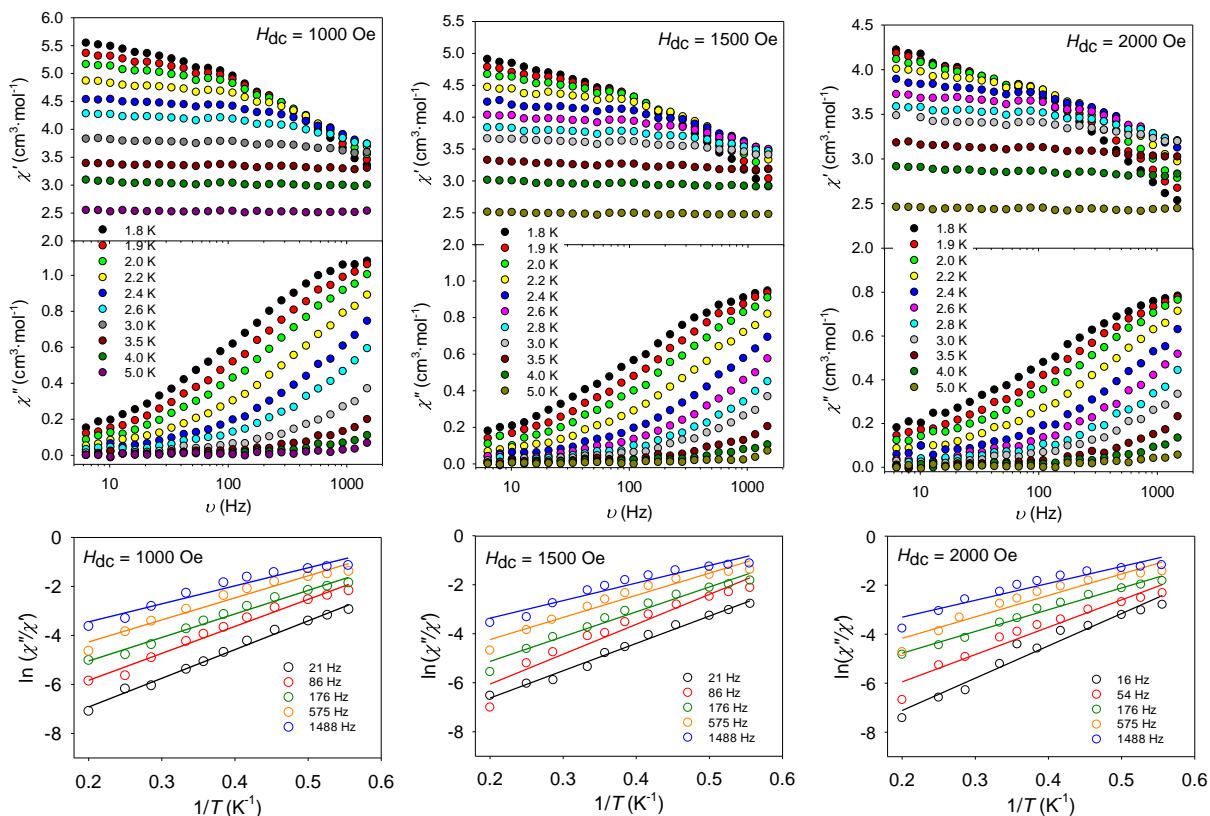

**Figure S4** Top: Ac dynamic measurements for **3** under dc fields of 1000 Oe (left), 1500 Oe (centre) and 2000 Oe (right) at various temperatures in the range 1.8 – 5.0 K. Bottom: fit of the experimental ac susceptibility by the Kramers–Kronig–derivate equation of the Arrhenius law (see main article for more info).<sup>[2]</sup>

**Table S5** Table with the relaxation rate ( $\tau_0$ ) and the energy barrier ( $\Delta E_a/k_B$ ) parameters extracted from the fit of the ac experiments at different dc fields.

| Applied $H_{dc}$ | $\Delta E/k_B$ (K) | $\tau_0$ (s)         |
|------------------|--------------------|----------------------|
| 1000 Oe          | $9.7 \pm 0.2$      | $7.2 \times 10^{-7}$ |
| 1500 Oe          | $9.9 \pm 0.3$      | $7.4 \times 10^{-7}$ |
| 2000 Oe          | $9.8 \pm 0.3$      | $8.8 \times 10^{-7}$ |

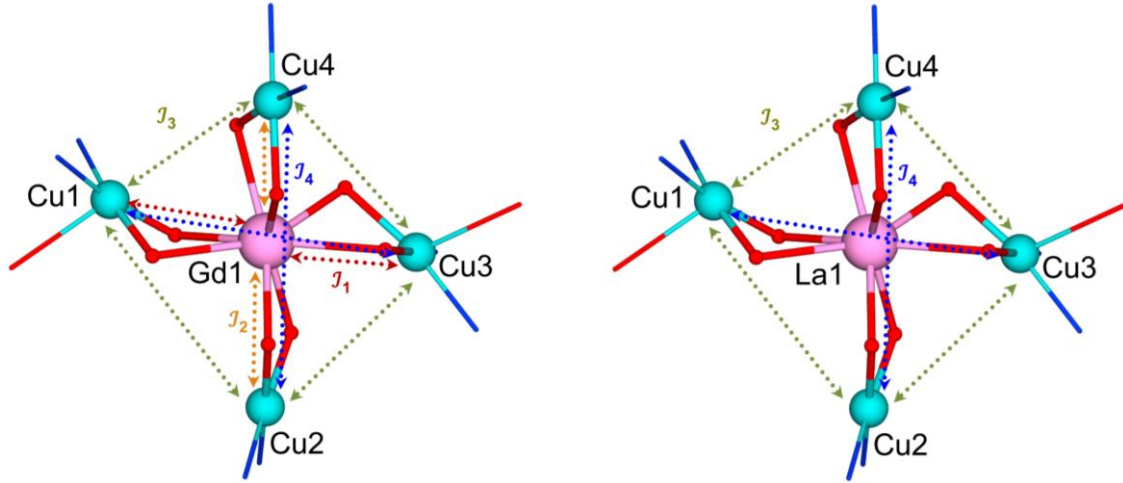

$$\begin{aligned} \{\text{GdCu}_4\} \text{ (1): } \hat{H} = & -2J_1(\hat{S}_{\text{Gd}1} \cdot \hat{S}_{\text{Cu}1} + \hat{S}_{\text{Gd}1} \cdot \hat{S}_{\text{Cu}3}) - 2J_2(\hat{S}_{\text{Gd}1} \cdot \hat{S}_{\text{Cu}2} + \hat{S}_{\text{Gd}1} \cdot \hat{S}_{\text{Cu}4}) - \\ & 2J_3(\hat{S}_{\text{Cu}1} \cdot \hat{S}_{\text{Cu}4} + \hat{S}_{\text{Cu}3} \cdot \hat{S}_{\text{Cu}4} + \hat{S}_{\text{Cu}2} \cdot \hat{S}_{\text{Cu}3} + \hat{S}_{\text{Cu}1} \cdot \hat{S}_{\text{Cu}2}) - \\ & 2J_4(\hat{S}_{\text{Cu}1} \cdot \hat{S}_{\text{Cu}3} + \hat{S}_{\text{Cu}2} \cdot \hat{S}_{\text{Cu}4}) + g_{\text{Gd}}\mu_B\vec{B}\vec{s}_{\text{Gd}} + g_{\text{Cu}}\mu_B\vec{B}\sum_{i=1}^4\vec{s}_i \end{aligned}$$

$$\begin{aligned} \{\text{LaCu}_4\} \text{ (4): } \hat{H} = & -2J_3(\hat{S}_{\text{Cu}1} \cdot \hat{S}_{\text{Cu}4} + \hat{S}_{\text{Cu}3} \cdot \hat{S}_{\text{Cu}4} + \hat{S}_{\text{Cu}2} \cdot \hat{S}_{\text{Cu}3} + \hat{S}_{\text{Cu}1} \cdot \hat{S}_{\text{Cu}2}) - \\ & 2J_4(\hat{S}_{\text{Cu}1} \cdot \hat{S}_{\text{Cu}3} + \hat{S}_{\text{Cu}2} \cdot \hat{S}_{\text{Cu}4}) + g_{\text{Cu}}\mu_B\vec{B}\sum_{i=1}^4\vec{s}_i \end{aligned}$$

**Figure S5** Magnetic model used for the DFT calculations and spin Hamiltonians used for the fit of the magnetic data for  $[\text{GdCu}_4(\text{H}_4\text{L})_4](\text{Cl})_2(\text{ClO}_4) \cdot 6\text{CH}_3\text{OH}$  (**1**) and  $[\text{LaCu}_4(\text{H}_4\text{L})_4](\text{Cl})_2(\text{ClO}_4) \cdot 6\text{CH}_3\text{OH}$  (**4**).



**Table S6** Experimental values for Cu...Gd distance, Cu–O–Gd angle, Cu–O–Gd–O torsion and magnetic exchange interaction ( $J_{\text{exp}}$ ) based on previously reported {GdCu} systems. Refcodes from the CSD are also displayed. All distances in Å, angles in degrees and exchange interactions in  $\text{cm}^{-1}$ .

|                                                                                   | Refcode | Cu...Gd | Cu–O–Gd | Cu–O–Gd | Cu–O–Gd–O | $J_{\text{exp}}$ | Ref. |
|-----------------------------------------------------------------------------------|---------|---------|---------|---------|-----------|------------------|------|
| GdCu(OTf) <sub>3</sub> (bdmap) <sub>2</sub> (H <sub>2</sub> O)·THF                | NEBLUB  | 3.310   | 105.46  | 104.67  | 0.51      | –0.08            | [3]  |
| [LCu(OH <sub>2</sub> )Gd(NO <sub>3</sub> ) <sub>3</sub> ]                         | YEBNAV  | 3.547   | 108.76  | 109.89  | 0.98      | 0.00             | [4]  |
| [CuGd{pyCO(OEt)py(COH(OEt)py) <sub>3</sub> }(ClO <sub>4</sub> ) <sub>2</sub> EtOH | KAJKAJ  | 3.031   | 87.88   | 86.95   | 36.14     | 0.32             | [5]  |
| [CuGd{pyCO(OEt)py(COH(OEt)py) <sub>3</sub> }(ClO <sub>4</sub> ) <sub>2</sub> EtOH | KAJKAJ  | 3.031   | 87.88   | 82.34   | 44.94     | 0.32             | [5]  |
| [CuGd{pyCO(OEt)py(COH(OEt)py) <sub>3</sub> }(ClO <sub>4</sub> ) <sub>2</sub> EtOH | KAJKAJ  | 3.031   | 86.95   | 82.34   | 41.73     | 0.32             | [5]  |
| Gd(hfa) <sub>3</sub> Cu(salen)                                                    | RINQAG  | 3.230   | 94.28   | 95.79   | 33.52     | 0.40             | [6]  |
| Gd(hfa) <sub>3</sub> Cu(salen)                                                    | RINQAG  | 3.199   | 93.84   | 93.60   | 34.43     | 0.40             | [6]  |
| Cu(salabza)Gd(hfac) <sub>3</sub>                                                  | JOGQAX  | 3.248   | 98.54   | 93.14   | 34.28     | 0.80             | [7]  |
| Cu(salen)Gd(pta) <sub>3</sub>                                                     | OFELAM  | 3.288   | 99.81   | 95.15   | 23.72     | 1.21             | [8]  |
| Cu(acacen)Gd(hfa) <sub>3</sub>                                                    | OFELIU  | 3.288   | 96.62   | 98.08   | 27.88     | 1.25             | [9]  |
| Cu(acacen)Gd(hfa) <sub>3</sub>                                                    | OFELIU  | 3.313   | 96.69   | 99.76   | 25.60     | 1.25             | [9]  |
| [TTF-salphen)CuGd(hfac) <sub>3</sub> ]                                            | UCIDER  | 3.260   | 97.23   | 96.45   | 27.18     | 1.29             | [10] |
| LCuGd(NO <sub>3</sub> ) <sub>3</sub> ·Me <sub>2</sub> CO                          | OBEMAK  | 3.444   | 105.15  | 106.80  | 4.05      | 1.30             | [11] |
| Gd(hfa) <sub>3</sub> Cu(salen)(Meim)                                              | RINQIO  | 3.252   | 98.28   | 95.05   | 29.40     | 1.42             | [12] |
| Cu(acacen)Gd(pta) <sub>3</sub>                                                    | OFELEQ  | 3.274   | 94.63   | 97.98   | 29.18     | 1.47             | [13] |
| Cu(ehphi)Gd(hfac) <sub>3</sub>                                                    | MIDHIQ  | 3.252   | 94.50   | 99.66   | 30.01     | 1.91             | [14] |

|                                                                                                                       |        |       |        |        |       |      |      |
|-----------------------------------------------------------------------------------------------------------------------|--------|-------|--------|--------|-------|------|------|
| [GdCu(L <sup>1</sup> -3H)(NO <sub>3</sub> )](NO <sub>3</sub> )H <sub>2</sub> O                                        | AHICID | 3.246 | 91.42  | 97.19  | 24.20 | 2.20 | [15] |
| [GdCu(L <sup>1</sup> -3H)(NO <sub>3</sub> )](NO <sub>3</sub> )H <sub>2</sub> O                                        | AHICID | 3.246 | 91.42  | 89.21  | 44.49 | 2.20 | [15] |
| [GdCu(L <sup>1</sup> -3H)(NO <sub>3</sub> )](NO <sub>3</sub> )H <sub>2</sub> O                                        | AHICID | 3.246 | 97.19  | 89.21  | 44.35 | 2.20 | [15] |
| [Cu(3-MeOsalt)(ac)Gd(hfac) <sub>2</sub> ]                                                                             | WISREX | 3.437 | 105.24 | 103.74 | 19.24 | 2.60 | [16] |
| CuGd(hmp) <sub>2</sub> (NO <sub>3</sub> ) <sub>3</sub> (H <sub>2</sub> O) <sub>2</sub>                                | XAYTIB | 3.346 | 102.05 | 102.83 | 15.32 | 3.36 | [17] |
| L <sub>1</sub> Cu(O <sub>2</sub> COMe)Gd(thd) <sub>2</sub>                                                            | JOQTEO | 3.473 | 103.98 | 103.78 | 14.60 | 3.50 | [18] |
| [CuGd(ems)(NO <sub>3</sub> ) 3H <sub>2</sub> O]Cu(ems)                                                                | XOZZUH | 3.306 | 100.15 | 98.90  | 17.79 | 3.76 | [19] |
| LCuGd(NO <sub>3</sub> ) <sub>3</sub> ·CH <sub>3</sub> OH                                                              | WIXYIL | 3.224 | 97.13  | 96.99  | 23.44 | 4.33 | [20] |
| [L <sub>1</sub> CuGd(O <sub>2</sub> CCF <sub>3</sub> ) <sub>3</sub> (C <sub>2</sub> H <sub>5</sub> OH) <sub>2</sub> ] | AXIGUJ | 3.391 | 103.21 | 103.33 | 10.25 | 4.42 | [21] |
| LCu(C <sub>3</sub> H <sub>6</sub> O)Gd(NO <sub>3</sub> ) <sub>3</sub>                                                 | NEVHIF | 3.523 | 108.12 | 108.03 | 13.52 | 4.80 | [22] |
| [Cu(valaepy) <sub>2</sub> Gd(O <sub>2</sub> NO) <sub>3</sub> ]CH <sub>3</sub> CN                                      | VIBKOI | 3.506 | 106.55 | 110.78 | 2.00  | 4.94 | [23] |
| LCuGd(NO <sub>3</sub> ) <sub>3</sub>                                                                                  | AWUQUE | 3.443 | 103.42 | 103.72 | 14.14 | 4.98 | [24] |
| LCu(H <sub>2</sub> O)Gd(NCS) <sub>3</sub> ·Me <sub>2</sub> CO                                                         | BERPAQ | 3.454 | 106.28 | 106.57 | 15.41 | 5.50 | [25] |
| LCuGd(NO <sub>3</sub> ) <sub>3</sub> ·Me <sub>2</sub> CO                                                              | QEMYAI | 3.425 | 109.84 | 108.97 | 9.68  | 5.60 | [26] |
| [(HL <sub>3</sub> ) <sub>2</sub> CuGd(NO <sub>3</sub> ) <sub>3</sub> ]                                                | BUXZAW | 3.473 | 108.11 | 108.53 | 0.25  | 6.50 | [27] |
| LCu(MeOH)Gd(NO <sub>3</sub> ) <sub>3</sub>                                                                            | NEVHEB | 3.484 | 109.03 | 106.49 | 10.13 | 6.80 | [28] |
| LCuGd(NO <sub>3</sub> ) <sub>3</sub> ·Me <sub>2</sub> CO                                                              | ZUVTIT | 3.428 | 105.86 | 107.38 | 10.21 | 7.00 | [29] |
| [(HL <sub>1</sub> ) <sub>2</sub> Cu(CH <sub>3</sub> CN) <sub>2</sub> Gd(NO <sub>3</sub> ) <sub>3</sub> ]              | BUXYUP | 3.459 | 105.84 | 106.98 | 0.30  | 7.20 | [30] |
| [[{CuL}Gd(H <sub>2</sub> O) <sub>3</sub> {Co(CN) <sub>6</sub> }]·4H <sub>2</sub> O                                    | UMATEH | 3.510 | 106.68 | 107.50 | 7.46  | 7.24 | [31] |
| LCuGd(NO <sub>3</sub> ) <sub>3</sub> ·Me <sub>2</sub> CO                                                              | NAMDIP | 3.475 | 107.36 | 106.88 | 10.09 | 7.30 | [32] |

|                                                                                                             |        |       |        |        |       |       |      |
|-------------------------------------------------------------------------------------------------------------|--------|-------|--------|--------|-------|-------|------|
| LCuGd(NO <sub>3</sub> ) <sub>3</sub> ·Me <sub>2</sub> CO                                                    | EZAPAW | 3.473 | 107.57 | 107.27 | 9.29  | 7.40  | [33] |
| LCuGd(NO <sub>3</sub> ) <sub>3</sub> ·Me <sub>2</sub> CO                                                    | EZAPAW | 3.477 | 107.68 | 107.68 | 11.06 | 7.40  | [33] |
| [(3-MeOsalamo)CuGd(Oac) <sub>3</sub> ]                                                                      | GANFEH | 3.433 | 104.56 | 102.91 | 15.81 | 7.60  | [34] |
| LCuGd(NO <sub>3</sub> ) <sub>3</sub>                                                                        | GANFIL | 3.498 | 108.94 | 107.42 | 7.52  | 7.60  | [35] |
| LCuGd(NO <sub>3</sub> ) <sub>3</sub>                                                                        | GANFIL | 3.499 | 108.66 | 106.70 | 10.99 | 7.60  | [35] |
| [CuGd(L)(NO <sub>3</sub> ) <sub>2</sub> (H <sub>2</sub> O) <sub>3</sub> MeOH]NO <sub>3</sub> ·MeOH          | YABZOS | 3.539 | 108.81 | 107.06 | 2.05  | 7.89  | [36] |
| LCuGd(NO <sub>3</sub> ) <sub>3</sub>                                                                        | LOYTOI | 3.400 | 106.62 | 103.72 | 3.36  | 8.08  | [37] |
| [Cu(L <sup>1</sup> )(m-OH)Gd(NO <sub>3</sub> ) <sub>3</sub> (H <sub>2</sub> O)]                             | DOFMUH | 3.417 | 105.86 | 106.46 | 0.22  | 8.40  | [38] |
| [L <sup>2</sup> CuGd(trif) <sub>2</sub> (H <sub>2</sub> O) <sub>2</sub> ]·trif·H <sub>2</sub> O·acetone     | LOKNIJ | 3.369 | 106.24 | 105.42 | 3.13  | 8.60  | [39] |
| LCuGd(NO <sub>3</sub> )(CH <sub>3</sub> ) <sub>2</sub> CO]                                                  | FAKLOT | 3.454 | 107.25 | 106.71 | 8.96  | 8.63  | [40] |
| [CuGd(mmi) <sub>2</sub> (NO <sub>3</sub> ) <sub>3</sub> (H <sub>2</sub> O) <sub>2</sub> ]                   | YIWNIC | 3.366 | 103.62 | 104.71 | 3.80  | 8.70  | [41] |
| [(CN) <sub>5</sub> (bipy)W(CN)Cu(3-MeOsalp)Gd(O <sub>2</sub> NO <sub>2</sub> )(H <sub>2</sub> O)]<br>·3MeCN | GAWPOL | 3.466 | 106.61 | 107.50 | 10.36 | 8.79  | [42] |
| [LCuCl <sub>2</sub> Gd(H <sub>2</sub> O) <sub>4</sub> ]Cl·2H <sub>2</sub> O                                 | KEQRED | 3.512 | 108.65 | 108.81 | 1.38  | 10.10 | [43] |
| LCuGd(NO <sub>3</sub> ) <sub>3</sub>                                                                        | LAMBOR | 3.449 | 107.85 | 105.27 | 5.63  | 10.80 | [44] |
| [(GdCuL <sup>1</sup> Cl <sub>3</sub> (CH <sub>3</sub> OH) <sub>2</sub> ]                                    | LEWZUK | 3.409 | 104.81 | 105.56 | 11.92 | 11.20 | [45] |
| LCuGd(NO <sub>3</sub> ) <sub>3</sub>                                                                        | LAMBUX | 3.401 | 104.18 | 105.77 | 1.61  | 12.60 | [46] |

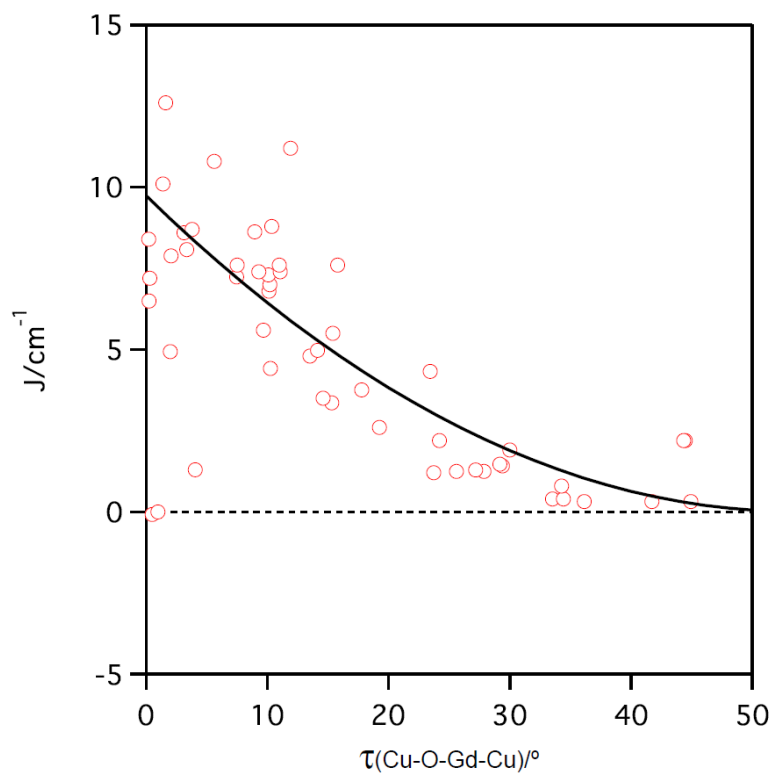

**Figure S6** Experimental dependence of the  $J$  values for {GdCu} systems<sup>4-46</sup> with the torsion angle defined as  $\tau(\text{Cu-O-Gd-Cu})^\circ$ .

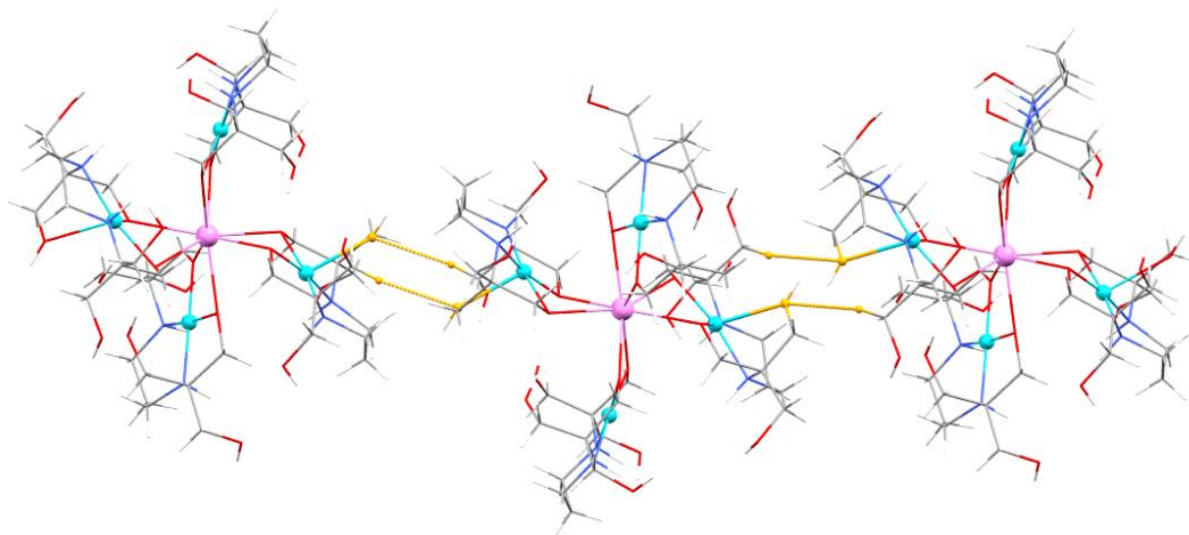

**Figure S7** Van der Waals interactions (highlighted in orange) for  $[\text{LnCu}_4(\text{H}_4\text{L})_4](\text{Cl})_2(\text{ClO}_4) \cdot 6\text{CH}_3\text{OH}$ . The shortest intermolecular  $\text{Cu} \cdots \text{Cu}'$  interaction is 7.561(1) Å in **1** and 7.436(1) Å in **4** and is between the Cu(Sbp) centres. C, grey; Cu, turquoise; H, white; Ln, pink; N, blue; O, red.

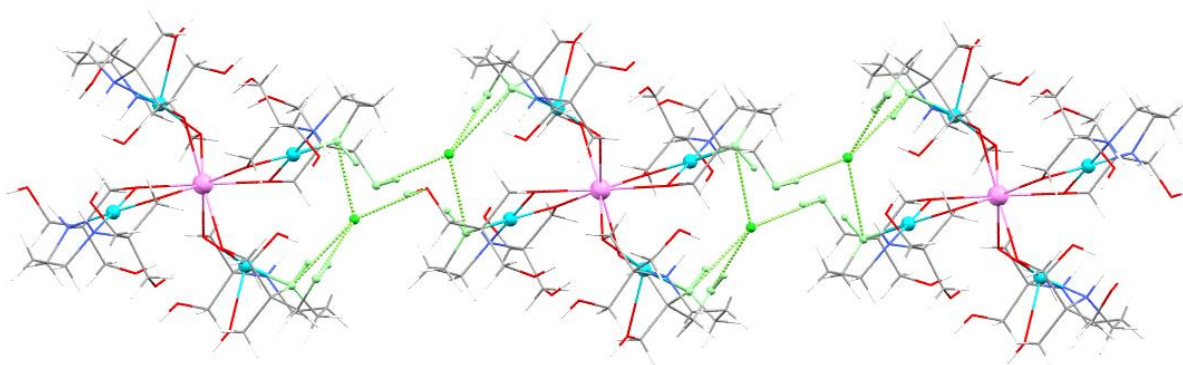

**Figure S8** Intermolecular hydrogen bonding interactions via  $\text{Cl}^-$  anions (highlighted in green) for  $[\text{LnCu}_4(\text{H}_4\text{L})_4](\text{Cl})_2(\text{ClO}_4) \cdot 6\text{CH}_3\text{OH}$ .  $\text{Cu}(\text{Sp}) \cdots \text{Cu}(\text{Sp})'$  is 7.821(1) Å in **1** and 7.710(1) Å in **4**. C, grey; Cl, green; Cu, turquoise; Ln, pink; H, white; N, blue; O, red.

**Table S7:** Computed spin densities and energies for each of the calculated spin distributions in systems **1** ( $\{\text{GdCu}_4\}$ ) and **4** ( $\{\text{LaCu}_4\}$ ). All energies in atomic units.

|            | $\text{La}_1^{\text{III}}$ | $\text{Cu}_2^{\text{II}}$ | $\text{Cu}_3^{\text{II}}$ | $\text{Cu}_4^{\text{II}}$ | $\text{Cu}_5^{\text{II}}$ | Energy/au      |
|------------|----------------------------|---------------------------|---------------------------|---------------------------|---------------------------|----------------|
| <i>HS</i>  | -0.0057                    | 0.5929                    | 0.6156                    | 0.5929                    | 0.6159                    | -18783.2622632 |
| <i>SD1</i> | -0.0102                    | -0.5942                   | 0.6145                    | -0.5943                   | 0.6147                    | -18783.2622579 |
| <i>SD2</i> | 0.0102                     | 0.5942                    | -0.6145                   | 0.5943                    | -0.6147                   | -18783.2622579 |
| <i>SD3</i> | -0.0080                    | 0.5927                    | 0.6160                    | -0.5941                   | 0.6143                    | -18783.2622597 |

|            | $\text{Gd}_1^{\text{III}}$ | $\text{Cu}_2^{\text{II}}$ | $\text{Cu}_3^{\text{II}}$ | $\text{Cu}_4^{\text{II}}$ | $\text{Cu}_5^{\text{II}}$ | Energy/au      |
|------------|----------------------------|---------------------------|---------------------------|---------------------------|---------------------------|----------------|
| <i>HS</i>  | 6.9276                     | 0.6074                    | 0.5863                    | 0.6075                    | 0.5863                    | -21704.3580600 |
| <i>SD1</i> | 6.9478                     | -0.6042                   | 0.5872                    | -0.6042                   | 0.5872                    | -21704.3580370 |
| <i>SD2</i> | 6.9291                     | 0.6081                    | -0.5839                   | 0.6082                    | -0.5838                   | -21704.3578087 |
| <i>SD3</i> | 6.9385                     | -0.6040                   | -0.5829                   | 0.6079                    | 0.5862                    | -21704.3579818 |
| <i>SD4</i> | 6.9384                     | -0.6039                   | 0.5872                    | 0.6078                    | -0.5839                   | -21704.3578905 |
| <i>SD5</i> | 6.9377                     | -0.6043                   | 0.5872                    | 0.6075                    | 0.5863                    | -21704.3580496 |
| <i>SD6</i> | 6.9377                     | 0.6075                    | 0.5863                    | -0.6043                   | 0.5872                    | -21704.3580495 |

**Table S8:** Bond lengths for **1** (Gd).

| Atom 1 | Atom 2            | Length/Å  |  | Atom 1 | Atom 2 | Length/Å  |
|--------|-------------------|-----------|--|--------|--------|-----------|
| Gd1    | Cu1 <sup>1</sup>  | 3.2495(7) |  | N101   | C102   | 1.490(7)  |
| Gd1    | Cu1               | 3.2495(7) |  | N101   | C103   | 1.511(7)  |
| Gd1    | Cu2               | 3.3105(8) |  | N102   | C107   | 1.487(7)  |
| Gd1    | Cu2 <sup>1</sup>  | 3.3104(8) |  | N102   | C108   | 1.513(7)  |
| Gd1    | O105 <sup>1</sup> | 2.428(4)  |  | N201   | C202   | 1.474(7)  |
| Gd1    | O105              | 2.428(4)  |  | N201   | C203   | 1.496(7)  |
| Gd1    | O109              | 2.519(4)  |  | N202   | C207   | 1.488(7)  |
| Gd1    | O109 <sup>1</sup> | 2.519(4)  |  | N202   | C208   | 1.490(7)  |
| Gd1    | O204              | 2.379(4)  |  | C101   | C102   | 1.509(8)  |
| Gd1    | O204 <sup>1</sup> | 2.379(4)  |  | C101   | C107   | 1.515(8)  |
| Gd1    | O209              | 2.341(4)  |  | C103   | C104   | 1.543(9)  |
| Gd1    | O209 <sup>1</sup> | 2.341(4)  |  | C103   | C105   | 1.546(8)  |
| Cu1    | O104              | 2.408(4)  |  | C103   | C106   | 1.513(9)  |
| Cu1    | O105              | 1.917(4)  |  | C108   | C109   | 1.535(8)  |
| Cu1    | O109              | 1.947(4)  |  | C108   | C110   | 1.524(8)  |
| Cu1    | N101              | 2.015(5)  |  | C108   | C111   | 1.536(8)  |
| Cu1    | N102              | 1.972(5)  |  | C201   | C202   | 1.523(8)  |
| Cu2    | O204              | 1.929(4)  |  | C201   | C207   | 1.520(9)  |
| Cu2    | O209              | 1.898(4)  |  | C203   | C204   | 1.547(8)  |
| Cu2    | N201              | 1.983(5)  |  | C203   | C205   | 1.523(8)  |
| Cu2    | N202              | 1.991(5)  |  | C203   | C206   | 1.517(8)  |
| O104   | C104              | 1.442(8)  |  | C208   | C209   | 1.543(8)  |
| O105   | C105              | 1.421(7)  |  | C208   | C210   | 1.527(8)  |
| O106   | C106              | 1.415(8)  |  | C208   | C211   | 1.531(8)  |
| O109   | C109              | 1.417(7)  |  | Cl2    | O1     | 1.395(10) |
| O110   | C110              | 1.435(7)  |  | Cl2    | O2     | 1.421(12) |
| O111   | C111              | 1.425(8)  |  | Cl2    | O3     | 1.388(9)  |
| O204   | C204              | 1.400(7)  |  | Cl2    | O4     | 1.296(6)  |
| O205   | C205              | 1.419(7)  |  | O7     | C7     | 1.391(9)  |
| O206   | C206              | 1.423(7)  |  | O6     | C6     | 1.40(2)   |
| O209   | C209              | 1.399(7)  |  | O5     | C5     | 1.506(14) |
| O210   | C210              | 1.412(7)  |  | O8     | C8     | 1.400(8)  |
| O211   | C211              | 1.425(7)  |  |        |        |           |

<sup>1</sup><sub>1-x,+y,3/2-z</sub>

**Table S9:** Bond lengths for **2** (Tb).

| Atom 1 | Atom 2            | Length/Å  |  | Atom 1 | Atom 2 | Length/Å  |
|--------|-------------------|-----------|--|--------|--------|-----------|
| Tb1    | Cu1               | 3.2417(4) |  | N101   | C102   | 1.485(5)  |
| Tb1    | Cu1 <sup>1</sup>  | 3.2416(4) |  | N101   | C103   | 1.504(5)  |
| Tb1    | Cu2               | 3.3036(4) |  | N102   | C107   | 1.486(5)  |
| Tb1    | Cu2 <sup>1</sup>  | 3.3035(4) |  | N102   | C108   | 1.502(5)  |
| Tb1    | O105 <sup>1</sup> | 2.418(2)  |  | N201   | C202   | 1.487(5)  |
| Tb1    | O105              | 2.418(2)  |  | N201   | C203   | 1.493(5)  |
| Tb1    | O109 <sup>1</sup> | 2.501(2)  |  | N202   | C207   | 1.496(5)  |
| Tb1    | O109              | 2.501(2)  |  | N202   | C208   | 1.500(5)  |
| Tb1    | O204 <sup>1</sup> | 2.368(2)  |  | C101   | C102   | 1.522(5)  |
| Tb1    | O204              | 2.368(2)  |  | C101   | C107   | 1.523(5)  |
| Tb1    | O209 <sup>1</sup> | 2.323(2)  |  | C103   | C104   | 1.541(5)  |
| Tb1    | O209              | 2.323(2)  |  | C103   | C105   | 1.530(5)  |
| Cu1    | O104              | 2.411(3)  |  | C103   | C106   | 1.529(5)  |
| Cu1    | O105              | 1.918(2)  |  | C108   | C109   | 1.544(5)  |
| Cu1    | O109              | 1.939(2)  |  | C108   | C110   | 1.527(5)  |
| Cu1    | N101              | 2.016(3)  |  | C108   | C111   | 1.539(5)  |
| Cu1    | N102              | 1.978(3)  |  | C201   | C202   | 1.518(5)  |
| Cu2    | O204              | 1.925(2)  |  | C201   | C207   | 1.521(5)  |
| Cu2    | O209              | 1.906(2)  |  | C203   | C204   | 1.539(5)  |
| Cu2    | N201              | 1.985(3)  |  | C203   | C205   | 1.533(5)  |
| Cu2    | N202              | 1.989(3)  |  | C203   | C206   | 1.529(5)  |
| O104   | C104              | 1.442(5)  |  | C208   | C209   | 1.551(5)  |
| O105   | C105              | 1.422(4)  |  | C208   | C210   | 1.534(5)  |
| O106   | C106              | 1.411(5)  |  | C208   | C211   | 1.523(5)  |
| O109   | C109              | 1.428(4)  |  | O7     | C7     | 1.405(6)  |
| O110   | C110              | 1.440(5)  |  | O8     | C8     | 1.415(5)  |
| O111   | C111              | 1.430(5)  |  | Cl2    | O1     | 1.408(7)  |
| O204   | C204              | 1.410(4)  |  | Cl2    | O2     | 1.407(9)  |
| O205   | C205              | 1.424(5)  |  | Cl2    | O3     | 1.406(6)  |
| O206   | C206              | 1.424(5)  |  | Cl2    | O4     | 1.292(4)  |
| O209   | C209              | 1.398(4)  |  | O5     | C5     | 1.508(10) |
| O210   | C210              | 1.428(5)  |  | O6     | C6     | 1.416(15) |
| O211   | C211              | 1.423(5)  |  |        |        |           |

<sup>1</sup><sub>1-x,+y,3/2-z</sub>

**Table S10:** Bond lengths for **3** (Dy).

| Atom 1 | Atom 2            | Length/Å  |  | Atom 1 | Atom 2 | Length/Å  |
|--------|-------------------|-----------|--|--------|--------|-----------|
| Dy1    | Cu1 <sup>1</sup>  | 3.2347(6) |  | N101   | C103   | 1.502(5)  |
| Dy1    | Cu1               | 3.2347(6) |  | N102   | C107   | 1.483(5)  |
| Dy1    | Cu2               | 3.2941(6) |  | N102   | C108   | 1.492(5)  |
| Dy1    | Cu2 <sup>1</sup>  | 3.2941(6) |  | N201   | C202   | 1.482(5)  |
| Dy1    | O105 <sup>1</sup> | 2.409(3)  |  | N201   | C203   | 1.490(5)  |
| Dy1    | O105              | 2.409(3)  |  | N202   | C207   | 1.498(5)  |
| Dy1    | O109 <sup>1</sup> | 2.487(3)  |  | N202   | C208   | 1.491(5)  |
| Dy1    | O109              | 2.487(3)  |  | C101   | C102   | 1.509(6)  |
| Dy1    | O204              | 2.351(2)  |  | C101   | C107   | 1.523(6)  |
| Dy1    | O204 <sup>1</sup> | 2.351(2)  |  | C103   | C104   | 1.549(6)  |
| Dy1    | O209 <sup>1</sup> | 2.311(3)  |  | C103   | C105   | 1.541(5)  |
| Dy1    | O209              | 2.311(3)  |  | C103   | C106   | 1.530(6)  |
| Cu1    | O104              | 2.424(3)  |  | C108   | C109   | 1.537(5)  |
| Cu1    | O105              | 1.914(3)  |  | C108   | C110   | 1.518(5)  |
| Cu1    | O109              | 1.938(3)  |  | C108   | C111   | 1.545(6)  |
| Cu1    | N101              | 2.009(3)  |  | C201   | C202   | 1.517(6)  |
| Cu1    | N102              | 1.979(3)  |  | C201   | C207   | 1.515(6)  |
| Cu2    | O204              | 1.920(3)  |  | C203   | C204   | 1.536(5)  |
| Cu2    | O209              | 1.903(3)  |  | C203   | C205   | 1.537(5)  |
| Cu2    | N201              | 1.979(3)  |  | C203   | C206   | 1.529(5)  |
| Cu2    | N202              | 1.986(3)  |  | C208   | C209   | 1.534(5)  |
| O11B   | C110              | 1.498(13) |  | C208   | C210   | 1.536(6)  |
| O104   | C104              | 1.456(6)  |  | C208   | C211   | 1.533(6)  |
| O105   | C105              | 1.437(5)  |  | Cl2    | O1     | 1.371(12) |
| O106   | C106              | 1.391(7)  |  | Cl2    | O2     | 1.397(14) |
| O109   | C109              | 1.419(5)  |  | Cl2    | O3     | 1.388(7)  |
| O110   | C110              | 1.457(5)  |  | Cl2    | O4     | 1.248(5)  |
| O111   | C111              | 1.429(6)  |  | O5     | C5     | 1.573(15) |
| O204   | C204              | 1.409(4)  |  | O1AA   | O8     | 1.791(18) |
| O205   | C205              | 1.416(5)  |  | O1AA   | C8     | 1.275(18) |
| O206   | C206              | 1.421(5)  |  | O2AA   | C8     | 1.45(3)   |
| O209   | C209              | 1.402(5)  |  | O8     | C8     | 1.418(8)  |
| O210   | C210              | 1.417(5)  |  | O6     | C6     | 1.56(4)   |
| O211   | C211              | 1.419(5)  |  | O7     | C7     | 1.349(10) |
| N101   | C102              | 1.481(5)  |  |        |        |           |

<sup>1</sup><sub>1-X,+Y,3/2-Z</sub>



**Table S11:** Bond lengths for **4** (La).

| Atom 1 | Atom 2            | Length/Å  |  | Atom 1 | Atom 2 | Length/Å  |
|--------|-------------------|-----------|--|--------|--------|-----------|
| La1    | Cu1               | 3.3831(6) |  | N31    | C202   | 1.485(5)  |
| La1    | Cu1 <sup>1</sup>  | 3.3830(6) |  | N31    | C203   | 1.499(5)  |
| La1    | Cu2               | 3.3134(5) |  | N35    | C207   | 1.487(5)  |
| La1    | Cu2 <sup>1</sup>  | 3.3134(6) |  | N35    | C208   | 1.503(5)  |
| La1    | O104 <sup>1</sup> | 2.466(2)  |  | N101   | C102   | 1.490(5)  |
| La1    | O104              | 2.466(2)  |  | N101   | C103   | 1.487(5)  |
| La1    | O109 <sup>1</sup> | 2.420(2)  |  | N102   | C107   | 1.498(5)  |
| La1    | O109              | 2.420(2)  |  | N102   | C108   | 1.503(5)  |
| La1    | O205              | 2.532(3)  |  | C18    | C108   | 1.531(5)  |
| La1    | O205 <sup>1</sup> | 2.532(3)  |  | C101   | C102   | 1.523(5)  |
| La1    | O209 <sup>1</sup> | 2.581(2)  |  | C101   | C107   | 1.518(5)  |
| La1    | O209              | 2.581(2)  |  | C103   | C104   | 1.540(5)  |
| Cu1    | O104              | 1.940(3)  |  | C103   | C105   | 1.533(5)  |
| Cu1    | O109              | 1.917(2)  |  | C103   | C106   | 1.530(5)  |
| Cu1    | N101              | 1.995(3)  |  | C108   | C109   | 1.539(5)  |
| Cu1    | N102              | 1.996(3)  |  | C108   | C110   | 1.530(5)  |
| Cu2    | O204              | 2.393(3)  |  | C201   | C202   | 1.524(6)  |
| Cu2    | O205              | 1.934(3)  |  | C201   | C207   | 1.516(5)  |
| Cu2    | O209              | 1.946(3)  |  | C203   | C204   | 1.551(5)  |
| Cu2    | N31               | 2.016(3)  |  | C203   | C205   | 1.531(5)  |
| Cu2    | N35               | 1.991(3)  |  | C203   | C206   | 1.532(6)  |
| O104   | C104              | 1.405(4)  |  | C208   | C209   | 1.533(5)  |
| O105   | C105              | 1.407(5)  |  | C208   | C210   | 1.531(5)  |
| O106   | C106              | 1.422(5)  |  | C208   | C211   | 1.536(5)  |
| O109   | C109              | 1.389(4)  |  | Cl2    | O1     | 1.287(5)  |
| O110   | C110              | 1.413(5)  |  | Cl2    | O2     | 1.401(7)  |
| O111   | C18               | 1.417(5)  |  | Cl2    | O3     | 1.452(12) |
| O204   | C204              | 1.436(5)  |  | Cl2    | O4     | 1.401(9)  |
| O205   | C205              | 1.416(5)  |  | O1     | C7S    | 1.602(17) |
| O206   | C206              | 1.406(6)  |  | O5S    | C6S    | 1.43(2)   |
| O209   | C209              | 1.419(5)  |  | O1S    | C2S    | 1.414(6)  |
| O210   | C210              | 1.424(5)  |  | O1SA   | C2S    | 1.38(3)   |
| O211   | C211              | 1.438(6)  |  | O3S    | C4S    | 1.384(8)  |

<sup>1</sup><sub>1-x,y,3/2-z</sub>

**Table S12:** Bond angles for **1** (Gd).

| Atom 1            | Atom 2 | Atom 3            | Angle/°     |  | Atom 1 | Atom 2 | Atom 3 | Angle/°    |
|-------------------|--------|-------------------|-------------|--|--------|--------|--------|------------|
| Cu1               | Gd1    | Cu1 <sup>1</sup>  | 146.74(3)   |  | O204   | Cu2    | N201   | 87.57(18)  |
| Cu1 <sup>1</sup>  | Gd1    | Cu2 <sup>1</sup>  | 84.357(19)  |  | O204   | Cu2    | N202   | 172.18(18) |
| Cu1 <sup>1</sup>  | Gd1    | Cu2               | 103.440(18) |  | O209   | Cu2    | Gd1    | 43.72(11)  |
| Cu1               | Gd1    | Cu2               | 84.357(18)  |  | O209   | Cu2    | O204   | 86.42(16)  |
| Cu1               | Gd1    | Cu2 <sup>1</sup>  | 103.440(18) |  | O209   | Cu2    | N201   | 173.10(18) |
| Cu2 <sup>1</sup>  | Gd1    | Cu2               | 152.90(3)   |  | O209   | Cu2    | N202   | 86.67(18)  |
| O105              | Gd1    | Cu1 <sup>1</sup>  | 168.67(10)  |  | N201   | Cu2    | Gd1    | 129.54(14) |
| O105 <sup>1</sup> | Gd1    | Cu1 <sup>1</sup>  | 35.91(9)    |  | N201   | Cu2    | N202   | 99.5(2)    |
| O105              | Gd1    | Cu1               | 35.91(9)    |  | N202   | Cu2    | Gd1    | 129.10(14) |
| O105 <sup>1</sup> | Gd1    | Cu1               | 168.67(10)  |  | C104   | O104   | Cu1    | 102.4(3)   |
| O105              | Gd1    | Cu2 <sup>1</sup>  | 84.51(10)   |  | Cu1    | O105   | Gd1    | 96.12(15)  |
| O105 <sup>1</sup> | Gd1    | Cu2 <sup>1</sup>  | 87.48(10)   |  | C105   | O105   | Gd1    | 129.9(3)   |
| O105              | Gd1    | Cu2               | 87.48(10)   |  | C105   | O105   | Cu1    | 108.6(3)   |
| O105 <sup>1</sup> | Gd1    | Cu2               | 84.51(10)   |  | Cu1    | O109   | Gd1    | 92.47(14)  |
| O105              | Gd1    | O105 <sup>1</sup> | 145.32(18)  |  | C109   | O109   | Gd1    | 132.1(3)   |
| O105              | Gd1    | O109              | 64.67(12)   |  | C109   | O109   | Cu1    | 110.1(3)   |
| O105              | Gd1    | O109 <sup>1</sup> | 148.86(12)  |  | Cu2    | O204   | Gd1    | 99.90(15)  |
| O105 <sup>1</sup> | Gd1    | O109 <sup>1</sup> | 64.67(12)   |  | C204   | O204   | Gd1    | 146.3(3)   |
| O105 <sup>1</sup> | Gd1    | O109              | 148.86(13)  |  | C204   | O204   | Cu2    | 109.9(3)   |
| O109 <sup>1</sup> | Gd1    | Cu1 <sup>1</sup>  | 36.76(8)    |  | Cu2    | O209   | Gd1    | 102.20(16) |
| O109              | Gd1    | Cu1 <sup>1</sup>  | 112.95(9)   |  | C209   | O209   | Gd1    | 145.0(4)   |
| O109              | Gd1    | Cu1               | 36.77(9)    |  | C209   | O209   | Cu2    | 112.3(3)   |
| O109 <sup>1</sup> | Gd1    | Cu1               | 112.95(8)   |  | C102   | N101   | Cu1    | 119.0(4)   |
| O109 <sup>1</sup> | Gd1    | Cu2 <sup>1</sup>  | 111.11(9)   |  | C102   | N101   | C103   | 115.6(4)   |
| O109              | Gd1    | Cu2               | 111.11(9)   |  | C103   | N101   | Cu1    | 100.6(3)   |
| O109 <sup>1</sup> | Gd1    | Cu2               | 88.65(9)    |  | C107   | N102   | Cu1    | 115.7(4)   |
| O109              | Gd1    | Cu2 <sup>1</sup>  | 88.65(9)    |  | C107   | N102   | C108   | 117.6(4)   |
| O109 <sup>1</sup> | Gd1    | O109              | 88.17(17)   |  | C108   | N102   | Cu1    | 107.4(3)   |
| O204              | Gd1    | Cu11              | 107.60(9)   |  | C202   | N201   | Cu2    | 115.4(4)   |
| O204 <sup>1</sup> | Gd1    | Cu11              | 61.30(9)    |  | C202   | N201   | C203   | 117.0(4)   |
| O204              | Gd1    | Cu1               | 61.30(9)    |  | C203   | N201   | Cu2    | 106.8(4)   |
| O204 <sup>1</sup> | Gd1    | Cu1               | 107.60(9)   |  | C207   | N202   | Cu2    | 118.1(4)   |
| O204              | Gd1    | Cu2 <sup>1</sup>  | 164.67(9)   |  | C207   | N202   | C208   | 115.5(5)   |
| O204              | Gd1    | Cu2               | 35.04(9)    |  | C208   | N202   | Cu2    | 107.8(4)   |
| O204 <sup>1</sup> | Gd1    | Cu2 <sup>1</sup>  | 35.04(9)    |  | C102   | C101   | C107   | 115.4(5)   |
| O204 <sup>1</sup> | Gd1    | Cu2               | 164.67(9)   |  | N101   | C102   | C101   | 112.0(5)   |
| O204 <sup>1</sup> | Gd1    | O105              | 107.83(13)  |  | N101   | C103   | C104   | 108.3(5)   |
| O204 <sup>1</sup> | Gd1    | O105 <sup>1</sup> | 83.05(13)   |  | N101   | C103   | C105   | 103.0(4)   |
| O204              | Gd1    | O105 <sup>1</sup> | 107.84(13)  |  | N101   | C103   | C106   | 116.0(5)   |
| O204              | Gd1    | O105              | 83.05(13)   |  | C104   | C103   | C105   | 111.4(5)   |
| O204 <sup>1</sup> | Gd1    | O109              | 76.24(13)   |  | C106   | C103   | C104   | 106.5(5)   |
| O204              | Gd1    | O109              | 77.95(13)   |  | C106   | C103   | C105   | 111.7(5)   |
| O204 <sup>1</sup> | Gd1    | O109 <sup>1</sup> | 77.95(13)   |  | O104   | C104   | C103   | 111.7(5)   |
| O204              | Gd1    | O109 <sup>1</sup> | 76.24(13)   |  | O105   | C105   | C103   | 110.7(5)   |
| O204 <sup>1</sup> | Gd1    | O204              | 143.78(18)  |  | O106   | C106   | C103   | 116.1(5)   |
| O209 <sup>1</sup> | Gd1    | Cu1 <sup>1</sup>  | 96.65(9)    |  | N102   | C107   | C101   | 109.6(5)   |
| O209              | Gd1    | Cu1 <sup>1</sup>  | 107.87(9)   |  | N102   | C108   | C109   | 104.5(4)   |

|                   |     |                   |            |  |      |      |      |           |
|-------------------|-----|-------------------|------------|--|------|------|------|-----------|
| O209              | Gd1 | Cu1               | 96.65(9)   |  | N102 | C108 | C110 | 109.5(5)  |
| O209 <sup>1</sup> | Gd1 | Cu1               | 107.87(9)  |  | N102 | C108 | C111 | 109.8(5)  |
| O209              | Gd1 | Cu2               | 34.08(9)   |  | C109 | C108 | C111 | 109.7(5)  |
| O209              | Gd1 | Cu2 <sup>1</sup>  | 118.83(9)  |  | C110 | C108 | C109 | 111.7(5)  |
| O209 <sup>1</sup> | Gd1 | Cu2 <sup>1</sup>  | 34.08(9)   |  | C110 | C108 | C111 | 111.5(5)  |
| O209 <sup>1</sup> | Gd1 | Cu2               | 118.83(9)  |  | O109 | C109 | C108 | 112.4(4)  |
| O209 <sup>1</sup> | Gd1 | O105              | 75.08(13)  |  | O110 | C110 | C108 | 106.2(5)  |
| O209 <sup>1</sup> | Gd1 | O105 <sup>1</sup> | 79.47(13)  |  | O111 | C111 | C108 | 111.4(5)  |
| O209              | Gd1 | O105 <sup>1</sup> | 75.08(13)  |  | C207 | C201 | C202 | 113.8(5)  |
| O209              | Gd1 | O105              | 79.47(13)  |  | N201 | C202 | C201 | 111.6(5)  |
| O209 <sup>1</sup> | Gd1 | O109              | 112.57(13) |  | N201 | C203 | C204 | 105.2(4)  |
| O209 <sup>1</sup> | Gd1 | O109 <sup>1</sup> | 132.61(13) |  | N201 | C203 | C205 | 110.5(5)  |
| O209              | Gd1 | O109              | 132.61(12) |  | N201 | C203 | C206 | 112.4(5)  |
| O209              | Gd1 | O109 <sup>1</sup> | 112.57(13) |  | C205 | C203 | C204 | 110.7(5)  |
| O209 <sup>1</sup> | Gd1 | O204 <sup>1</sup> | 67.45(12)  |  | C206 | C203 | C204 | 110.1(5)  |
| O209              | Gd1 | O204              | 67.45(12)  |  | C206 | C203 | C205 | 108.0(5)  |
| O209              | Gd1 | O204 <sup>1</sup> | 147.42(13) |  | O204 | C204 | C203 | 113.3(5)  |
| O209 <sup>1</sup> | Gd1 | O204              | 147.42(13) |  | O205 | C205 | C203 | 114.5(5)  |
| O209              | Gd1 | O209 <sup>1</sup> | 84.80(18)  |  | O206 | C206 | C203 | 112.7(5)  |
| O104              | Cu1 | Gd1               | 127.86(11) |  | N202 | C207 | C201 | 112.0(5)  |
| O105              | Cu1 | Gd1               | 47.97(11)  |  | N202 | C208 | C209 | 106.0(5)  |
| O105              | Cu1 | O104              | 86.07(16)  |  | N202 | C208 | C210 | 110.9(5)  |
| O105              | Cu1 | O109              | 86.49(16)  |  | N202 | C208 | C211 | 110.6(5)  |
| O105              | Cu1 | N101              | 87.88(18)  |  | C210 | C208 | C209 | 109.5(5)  |
| O105              | Cu1 | N102              | 172.15(18) |  | C210 | C208 | C211 | 109.1(5)  |
| O109              | Cu1 | Gd1               | 50.76(11)  |  | C211 | C208 | C209 | 110.6(5)  |
| O109              | Cu1 | O104              | 115.42(16) |  | O209 | C209 | C208 | 111.7(5)  |
| O109              | Cu1 | N101              | 169.48(18) |  | O210 | C210 | C208 | 111.6(5)  |
| O109              | Cu1 | N102              | 86.77(18)  |  | O211 | C211 | C208 | 114.8(5)  |
| N101              | Cu1 | Gd1               | 119.42(14) |  | O1   | Cl2  | O2   | 107.2(10) |
| N101              | Cu1 | O104              | 73.00(18)  |  | O3   | Cl2  | O1   | 112.4(7)  |
| N102              | Cu1 | Gd1               | 124.22(14) |  | O3   | Cl2  | O2   | 112.5(9)  |
| N102              | Cu1 | O104              | 100.47(18) |  | O4   | Cl2  | O1   | 108.7(7)  |
| N102              | Cu1 | N101              | 98.14(19)  |  | O4   | Cl2  | O2   | 107.0(9)  |
| O204              | Cu2 | Gd1               | 45.06(11)  |  | O4   | Cl2  | O3   | 108.8(6)  |

<sup>1</sup><sub>1-x,y,3/2-z</sub>

**Table S13:** Bond Angles for **2** (Tb).

| Atom 1            | Atom 2 | Atom 3            | Angle/°     |  | Atom 1 | Atom 2 | Atom 3 | Angle/°    |
|-------------------|--------|-------------------|-------------|--|--------|--------|--------|------------|
| Cu1 <sup>1</sup>  | Tb1    | Cu1               | 146.690(18) |  | O204   | Cu2    | N201   | 87.66(11)  |
| Cu1               | Tb1    | Cu2 <sup>1</sup>  | 103.482(11) |  | O204   | Cu2    | N202   | 172.07(11) |
| Cu1               | Tb1    | Cu2               | 84.299(11)  |  | O209   | Cu2    | Tb1    | 43.41(7)   |
| Cu1 <sup>1</sup>  | Tb1    | Cu2               | 103.482(11) |  | O209   | Cu2    | O204   | 85.98(10)  |
| Cu1 <sup>1</sup>  | Tb1    | Cu2 <sup>1</sup>  | 84.295(11)  |  | O209   | Cu2    | N201   | 172.81(12) |
| Cu2 <sup>1</sup>  | Tb1    | Cu2               | 153.009(17) |  | O209   | Cu2    | N202   | 87.00(11)  |
| O105              | Tb1    | Cu1               | 36.05(6)    |  | N201   | Cu2    | Tb1    | 129.53(9)  |
| O105 <sup>1</sup> | Tb1    | Cu1               | 168.56(6)   |  | N201   | Cu2    | N202   | 99.55(12)  |
| O105              | Tb1    | Cu1 <sup>1</sup>  | 168.56(6)   |  | N202   | Cu2    | Tb1    | 129.15(9)  |
| O105 <sup>1</sup> | Tb1    | Cu1 <sup>1</sup>  | 36.05(6)    |  | C104   | O104   | Cu1    | 102.4(2)   |
| O105              | Tb1    | Cu2 <sup>1</sup>  | 84.45(6)    |  | Cu1    | O105   | Tb1    | 96.06(10)  |
| O105 <sup>1</sup> | Tb1    | Cu2 <sup>1</sup>  | 87.53(6)    |  | C105   | O105   | Tb1    | 130.2(2)   |
| O105              | Tb1    | Cu2               | 87.53(6)    |  | C105   | O105   | Cu1    | 108.1(2)   |
| O105 <sup>1</sup> | Tb1    | Cu2               | 84.45(6)    |  | Cu1    | O109   | Tb1    | 92.91(9)   |
| O105              | Tb1    | O105 <sup>1</sup> | 145.16(12)  |  | C109   | O109   | Tb1    | 132.4(2)   |
| O105              | Tb1    | O109 <sup>1</sup> | 148.98(8)   |  | C109   | O109   | Cu1    | 110.18(19) |
| O105              | Tb1    | O109              | 64.77(8)    |  | Cu2    | O204   | Tb1    | 100.10(10) |
| O105 <sup>1</sup> | Tb1    | O109              | 148.98(8)   |  | C204   | O204   | Tb1    | 146.8(2)   |
| O105 <sup>1</sup> | Tb1    | O109 <sup>1</sup> | 64.76(8)    |  | C204   | O204   | Cu2    | 109.5(2)   |
| O109              | Tb1    | Cu1               | 36.68(5)    |  | Cu2    | O209   | Tb1    | 102.27(10) |
| O109 <sup>1</sup> | Tb1    | Cu1               | 112.93(6)   |  | C209   | O209   | Tb1    | 145.2(2)   |
| O109 <sup>1</sup> | Tb1    | Cu1 <sup>1</sup>  | 36.68(5)    |  | C209   | O209   | Cu2    | 112.0(2)   |
| O109              | Tb1    | Cu1 <sup>1</sup>  | 112.93(6)   |  | C102   | N101   | Cu1    | 119.1(2)   |
| O109              | Tb1    | Cu2 <sup>1</sup>  | 88.82(5)    |  | C102   | N101   | C103   | 115.9(3)   |
| O109 <sup>1</sup> | Tb1    | Cu2               | 88.82(5)    |  | C103   | N101   | Cu1    | 100.3(2)   |
| O109              | Tb1    | Cu2               | 110.87(5)   |  | C107   | N102   | Cu1    | 115.2(2)   |
| O109 <sup>1</sup> | Tb1    | Cu2 <sup>1</sup>  | 110.87(5)   |  | C107   | N102   | C108   | 117.8(3)   |
| O109              | Tb1    | O109 <sup>1</sup> | 88.02(11)   |  | C108   | N102   | Cu1    | 107.4(2)   |
| O204 <sup>1</sup> | Tb1    | Cu1               | 107.52(6)   |  | C202   | N201   | Cu2    | 115.5(2)   |
| O204              | Tb1    | Cu1               | 61.32(6)    |  | C202   | N201   | C203   | 116.9(3)   |
| O204 <sup>1</sup> | Tb1    | Cu1 <sup>1</sup>  | 61.32(6)    |  | C203   | N201   | Cu2    | 106.6(2)   |
| O204              | Tb1    | Cu1 <sup>1</sup>  | 107.53(6)   |  | C207   | N202   | Cu2    | 118.1(2)   |
| O204 <sup>1</sup> | Tb1    | Cu2 <sup>1</sup>  | 35.01(6)    |  | C207   | N202   | C208   | 115.3(3)   |
| O204 <sup>1</sup> | Tb1    | Cu2               | 164.72(6)   |  | C208   | N202   | Cu2    | 107.5(2)   |
| O204              | Tb1    | Cu2 <sup>1</sup>  | 164.72(6)   |  | C102   | C101   | C107   | 114.8(3)   |
| O204              | Tb1    | Cu2               | 35.01(6)    |  | N101   | C102   | C101   | 112.7(3)   |
| O204              | Tb1    | O105              | 83.24(8)    |  | N101   | C103   | C104   | 108.8(3)   |
| O204              | Tb1    | O105 <sup>1</sup> | 107.73(8)   |  | N101   | C103   | C105   | 103.1(3)   |
| O204 <sup>1</sup> | Tb1    | O105 <sup>1</sup> | 83.24(8)    |  | N101   | C103   | C106   | 115.3(3)   |
| O204 <sup>1</sup> | Tb1    | O105              | 107.73(8)   |  | C105   | C103   | C104   | 111.8(3)   |
| O204              | Tb1    | O109 <sup>1</sup> | 76.31(8)    |  | C106   | C103   | C104   | 106.5(3)   |
| O204 <sup>1</sup> | Tb1    | O109 <sup>1</sup> | 77.76(8)    |  | C106   | C103   | C105   | 111.3(3)   |
| O204              | Tb1    | O109              | 77.76(8)    |  | O104   | C104   | C103   | 111.4(3)   |
| O204 <sup>1</sup> | Tb1    | O109              | 76.31(8)    |  | O105   | C105   | C103   | 110.9(3)   |
| O204              | Tb1    | O204 <sup>1</sup> | 143.65(12)  |  | O106   | C106   | C103   | 116.4(3)   |
| O209              | Tb1    | Cu1               | 96.72(6)    |  | N102   | C107   | C101   | 110.2(3)   |
| O209 <sup>1</sup> | Tb1    | Cu1               | 107.91(6)   |  | N102   | C108   | C109   | 104.5(3)   |

|                   |     |                   |            |  |      |      |      |          |
|-------------------|-----|-------------------|------------|--|------|------|------|----------|
| O209 <sup>1</sup> | Tb1 | Cu1 <sup>1</sup>  | 96.72(6)   |  | N102 | C108 | C110 | 109.9(3) |
| O209              | Tb1 | Cu1 <sup>1</sup>  | 107.91(6)  |  | N102 | C108 | C111 | 110.0(3) |
| O209 <sup>1</sup> | Tb1 | Cu2               | 118.69(6)  |  | C110 | C108 | C109 | 111.4(3) |
| O209 <sup>1</sup> | Tb1 | Cu2 <sup>1</sup>  | 34.33(6)   |  | C110 | C108 | C111 | 111.8(3) |
| O209              | Tb1 | Cu2 <sup>1</sup>  | 118.69(6)  |  | C111 | C108 | C109 | 109.0(3) |
| O209              | Tb1 | Cu2               | 34.33(6)   |  | O109 | C109 | C108 | 111.8(3) |
| O209              | Tb1 | O105              | 79.43(8)   |  | O110 | C110 | C108 | 106.3(3) |
| O209              | Tb1 | O105 <sup>1</sup> | 74.93(8)   |  | O111 | C111 | C108 | 111.1(3) |
| O209 <sup>1</sup> | Tb1 | O105 <sup>1</sup> | 79.43(8)   |  | C202 | C201 | C207 | 114.2(3) |
| O209 <sup>1</sup> | Tb1 | O105              | 74.93(8)   |  | N201 | C202 | C201 | 111.4(3) |
| O209              | Tb1 | O109 <sup>1</sup> | 112.88(8)  |  | N201 | C203 | C204 | 105.2(3) |
| O209              | Tb1 | O109              | 132.59(8)  |  | N201 | C203 | C205 | 111.1(3) |
| O209 <sup>1</sup> | Tb1 | O109 <sup>1</sup> | 132.59(8)  |  | N201 | C203 | C206 | 112.1(3) |
| O209 <sup>1</sup> | Tb1 | O109              | 112.88(8)  |  | C205 | C203 | C204 | 111.2(3) |
| O209              | Tb1 | O204              | 67.68(8)   |  | C206 | C203 | C204 | 109.9(3) |
| O209 <sup>1</sup> | Tb1 | O204 <sup>1</sup> | 67.69(8)   |  | C206 | C203 | C205 | 107.4(3) |
| O209 <sup>1</sup> | Tb1 | O204              | 147.33(8)  |  | O204 | C204 | C203 | 113.1(3) |
| O209              | Tb1 | O204 <sup>1</sup> | 147.33(8)  |  | O205 | C205 | C203 | 113.5(3) |
| O209 <sup>1</sup> | Tb1 | O209              | 84.42(12)  |  | O206 | C206 | C203 | 112.0(3) |
| O104              | Cu1 | Tb1               | 127.69(7)  |  | N202 | C207 | C201 | 112.1(3) |
| O105              | Cu1 | Tb1               | 47.89(7)   |  | N202 | C208 | C209 | 105.8(3) |
| O105              | Cu1 | O104              | 85.97(10)  |  | N202 | C208 | C210 | 110.6(3) |
| O105              | Cu1 | O109              | 86.20(10)  |  | N202 | C208 | C211 | 111.3(3) |
| O105              | Cu1 | N101              | 87.76(11)  |  | C210 | C208 | C209 | 109.4(3) |
| O105              | Cu1 | N102              | 172.13(11) |  | C211 | C208 | C209 | 110.8(3) |
| O109              | Cu1 | Tb1               | 50.40(7)   |  | C211 | C208 | C210 | 108.9(3) |
| O109              | Cu1 | O104              | 115.65(10) |  | O209 | C209 | C208 | 111.8(3) |
| O109              | Cu1 | N101              | 169.09(12) |  | O210 | C210 | C208 | 111.0(3) |
| O109              | Cu1 | N102              | 86.82(11)  |  | O211 | C211 | C208 | 114.5(3) |
| N101              | Cu1 | Tb1               | 119.34(9)  |  | O2   | Cl2  | O1   | 107.2(7) |
| N101              | Cu1 | O104              | 72.90(11)  |  | O3   | Cl2  | O1   | 111.7(5) |
| N102              | Cu1 | Tb1               | 124.33(9)  |  | O3   | Cl2  | O2   | 112.5(6) |
| N102              | Cu1 | O104              | 100.34(11) |  | O4   | Cl2  | O1   | 107.9(5) |
| N102              | Cu1 | N101              | 98.55(12)  |  | O4   | Cl2  | O2   | 108.5(7) |
| O204              | Cu2 | Tb1               | 44.89(7)   |  | O4   | Cl2  | O3   | 108.8(4) |

<sup>1</sup><sub>1-x,y,3/2-z</sub>

**Table S14:** Bond Angles for **3** (Dy).

| Atom 1            | Atom 2 | Atom 3            | Angle/°     |  | Atom 1 | Atom 2 | Atom 3 | Angle/°    |
|-------------------|--------|-------------------|-------------|--|--------|--------|--------|------------|
| Cu1               | Dy1    | Cu1 <sup>1</sup>  | 146.278(19) |  | O209   | Cu2    | O204   | 85.65(11)  |
| Cu1               | Dy1    | Cu2               | 84.300(13)  |  | O209   | Cu2    | N201   | 172.60(13) |
| Cu1 <sup>1</sup>  | Dy1    | Cu2 <sup>1</sup>  | 84.301(12)  |  | O209   | Cu2    | N202   | 86.98(13)  |
| Cu1 <sup>1</sup>  | Dy1    | Cu2               | 103.635(12) |  | N201   | Cu2    | Dy1    | 129.47(10) |
| Cu1               | Dy1    | Cu2 <sup>1</sup>  | 103.636(12) |  | N201   | Cu2    | N202   | 99.81(14)  |
| Cu2 <sup>1</sup>  | Dy1    | Cu2               | 152.793(18) |  | N202   | Cu2    | Dy1    | 129.06(10) |
| O105 <sup>1</sup> | Dy1    | Cu1               | 168.74(6)   |  | C104   | O104   | Cu1    | 102.4(2)   |
| O105              | Dy1    | Cu1               | 36.04(7)    |  | Cu1    | O105   | Dy1    | 96.19(11)  |
| O105              | Dy1    | Cu1 <sup>1</sup>  | 168.74(6)   |  | C105   | O105   | Dy1    | 129.9(2)   |
| O105 <sup>1</sup> | Dy1    | Cu1 <sup>1</sup>  | 36.04(7)    |  | C105   | O105   | Cu1    | 109.2(2)   |
| O105 <sup>1</sup> | Dy1    | Cu2               | 84.69(6)    |  | Cu1    | O109   | Dy1    | 93.09(11)  |
| O105              | Dy1    | Cu2 <sup>1</sup>  | 84.69(6)    |  | C109   | O109   | Dy1    | 133.7(2)   |
| O105              | Dy1    | Cu2               | 87.30(6)    |  | C109   | O109   | Cu1    | 109.8(2)   |
| O105 <sup>1</sup> | Dy1    | Cu2 <sup>1</sup>  | 87.30(6)    |  | Cu2    | O204   | Dy1    | 100.45(11) |
| O105              | Dy1    | O105 <sup>1</sup> | 145.47(13)  |  | C204   | O204   | Dy1    | 146.4(2)   |
| O105 <sup>1</sup> | Dy1    | O109 <sup>1</sup> | 64.96(9)    |  | C204   | O204   | Cu2    | 109.9(2)   |
| O105              | Dy1    | O109              | 64.96(9)    |  | Cu2    | O209   | Dy1    | 102.39(11) |
| O105 <sup>1</sup> | Dy1    | O109              | 148.48(9)   |  | C209   | O209   | Dy1    | 145.6(2)   |
| O105              | Dy1    | O109 <sup>1</sup> | 148.48(9)   |  | C209   | O209   | Cu2    | 111.6(2)   |
| O109 <sup>1</sup> | Dy1    | Cu1               | 112.44(6)   |  | C102   | N101   | Cu1    | 118.8(3)   |
| O109 <sup>1</sup> | Dy1    | Cu1 <sup>1</sup>  | 36.75(6)    |  | C102   | N101   | C103   | 116.1(3)   |
| O109              | Dy1    | Cu1               | 36.75(6)    |  | C103   | N101   | Cu1    | 100.7(2)   |
| O109              | Dy1    | Cu1 <sup>1</sup>  | 112.44(6)   |  | C107   | N102   | Cu1    | 115.6(3)   |
| O109 <sup>1</sup> | Dy1    | Cu2 <sup>1</sup>  | 110.89(6)   |  | C107   | N102   | C108   | 118.0(3)   |
| O109 <sup>1</sup> | Dy1    | Cu2               | 89.06(6)    |  | C108   | N102   | Cu1    | 106.8(2)   |
| O109              | Dy1    | Cu2               | 110.89(6)   |  | C202   | N201   | Cu2    | 115.5(3)   |
| O109              | Dy1    | Cu2 <sup>1</sup>  | 89.06(6)    |  | C202   | N201   | C203   | 117.2(3)   |
| O109 <sup>1</sup> | Dy1    | O109              | 87.37(13)   |  | C203   | N201   | Cu2    | 106.5(2)   |
| O204              | Dy1    | Cu1               | 61.50(7)    |  | C207   | N202   | Cu2    | 117.8(3)   |
| O204              | Dy1    | Cu1 <sup>1</sup>  | 107.23(7)   |  | C208   | N202   | Cu2    | 107.3(2)   |
| O204 <sup>1</sup> | Dy1    | Cu1               | 107.22(7)   |  | C208   | N202   | C207   | 115.8(3)   |
| O204 <sup>1</sup> | Dy1    | Cu1 <sup>1</sup>  | 61.50(7)    |  | C102   | C101   | C107   | 114.9(4)   |
| O204              | Dy1    | Cu2 <sup>1</sup>  | 165.06(7)   |  | N101   | C102   | C101   | 112.8(3)   |
| O204 <sup>1</sup> | Dy1    | Cu2 <sup>1</sup>  | 34.97(7)    |  | N101   | C103   | C104   | 108.8(3)   |
| O204              | Dy1    | Cu2               | 34.97(7)    |  | N101   | C103   | C105   | 104.2(3)   |
| O204 <sup>1</sup> | Dy1    | Cu2               | 165.07(7)   |  | N101   | C103   | C106   | 115.4(4)   |
| O204              | Dy1    | O105              | 83.25(9)    |  | C105   | C103   | C104   | 111.9(3)   |
| O204 <sup>1</sup> | Dy1    | O105              | 107.62(9)   |  | C106   | C103   | C104   | 106.6(4)   |
| O204              | Dy1    | O105 <sup>1</sup> | 107.62(9)   |  | C106   | C103   | C105   | 109.9(4)   |
| O204 <sup>1</sup> | Dy1    | O105 <sup>1</sup> | 83.25(9)    |  | O104   | C104   | C103   | 110.8(3)   |
| O204 <sup>1</sup> | Dy1    | O109              | 76.05(9)    |  | O105   | C105   | C103   | 109.1(3)   |
| O204 <sup>1</sup> | Dy1    | O109 <sup>1</sup> | 77.86(9)    |  | O106   | C106   | C103   | 116.6(4)   |
| O204              | Dy1    | O109              | 77.86(9)    |  | N102   | C107   | C101   | 110.1(3)   |
| O204              | Dy1    | O109 <sup>1</sup> | 76.05(9)    |  | N102   | C108   | C109   | 105.0(3)   |
| O204 <sup>1</sup> | Dy1    | O204              | 143.64(13)  |  | N102   | C108   | C110   | 110.3(3)   |
| O209              | Dy1    | Cu1               | 96.89(7)    |  | N102   | C108   | C111   | 110.0(3)   |
| O209 <sup>1</sup> | Dy1    | Cu1 <sup>1</sup>  | 96.89(7)    |  | C109   | C108   | C111   | 108.9(3)   |

|                   |     |                   |            |  |      |      |      |           |
|-------------------|-----|-------------------|------------|--|------|------|------|-----------|
| O209 <sup>1</sup> | Dy1 | Cu1               | 108.10(6)  |  | C110 | C108 | C109 | 111.3(3)  |
| O209              | Dy1 | Cu1 <sup>1</sup>  | 108.10(6)  |  | C110 | C108 | C111 | 111.1(3)  |
| O209              | Dy1 | Cu2               | 34.36(6)   |  | O109 | C109 | C108 | 112.3(3)  |
| O209 <sup>1</sup> | Dy1 | Cu2 <sup>1</sup>  | 34.35(6)   |  | O11B | C110 | C108 | 106.5(10) |
| O209              | Dy1 | Cu2 <sup>1</sup>  | 118.45(7)  |  | O110 | C110 | C108 | 105.7(3)  |
| O209 <sup>1</sup> | Dy1 | Cu2               | 118.45(7)  |  | O111 | C111 | C108 | 111.0(4)  |
| O209 <sup>1</sup> | Dy1 | O105              | 75.15(9)   |  | C207 | C201 | C202 | 114.6(4)  |
| O209              | Dy1 | O105 <sup>1</sup> | 75.15(9)   |  | N201 | C202 | C201 | 111.3(3)  |
| O209 <sup>1</sup> | Dy1 | O105 <sup>1</sup> | 79.38(9)   |  | N201 | C203 | C204 | 105.8(3)  |
| O209              | Dy1 | O105              | 79.38(9)   |  | N201 | C203 | C205 | 110.8(3)  |
| O209 <sup>1</sup> | Dy1 | O109              | 113.21(9)  |  | N201 | C203 | C206 | 112.2(3)  |
| O209              | Dy1 | O109              | 132.80(9)  |  | C204 | C203 | C205 | 110.9(3)  |
| O209 <sup>1</sup> | Dy1 | O109 <sup>1</sup> | 132.80(9)  |  | C206 | C203 | C204 | 110.0(3)  |
| O209              | Dy1 | O109 <sup>1</sup> | 113.21(9)  |  | C206 | C203 | C205 | 107.1(3)  |
| O209 <sup>1</sup> | Dy1 | O204 <sup>1</sup> | 67.76(9)   |  | O204 | C204 | C203 | 112.7(3)  |
| O209              | Dy1 | O204 <sup>1</sup> | 147.32(9)  |  | O205 | C205 | C203 | 113.6(3)  |
| O209              | Dy1 | O204              | 67.76(9)   |  | O206 | C206 | C203 | 111.8(3)  |
| O209 <sup>1</sup> | Dy1 | O204              | 147.32(9)  |  | N202 | C207 | C201 | 112.0(4)  |
| O209              | Dy1 | O209 <sup>1</sup> | 84.15(13)  |  | N202 | C208 | C209 | 106.3(3)  |
| O104              | Cu1 | Dy1               | 126.61(9)  |  | N202 | C208 | C210 | 110.5(3)  |
| O105              | Cu1 | Dy1               | 47.77(8)   |  | N202 | C208 | C211 | 110.8(3)  |
| O105              | Cu1 | O104              | 85.38(12)  |  | C209 | C208 | C210 | 109.3(3)  |
| O105              | Cu1 | O109              | 86.11(11)  |  | C211 | C208 | C209 | 111.0(3)  |
| O105              | Cu1 | N101              | 87.81(13)  |  | C211 | C208 | C210 | 108.9(3)  |
| O105              | Cu1 | N102              | 172.41(12) |  | O209 | C209 | C208 | 111.7(3)  |
| O109              | Cu1 | Dy1               | 50.16(8)   |  | O210 | C210 | C208 | 111.2(4)  |
| O109              | Cu1 | O104              | 114.96(12) |  | O211 | C211 | C208 | 114.3(3)  |
| O109              | Cu1 | N101              | 169.53(13) |  | O1   | Cl2  | O2   | 108.9(11) |
| O109              | Cu1 | N102              | 86.98(12)  |  | O1   | Cl2  | O3   | 113.0(9)  |
| N101              | Cu1 | Dy1               | 119.92(10) |  | O3   | Cl2  | O2   | 113.3(11) |
| N101              | Cu1 | O104              | 72.96(13)  |  | O4   | Cl2  | O1   | 107.4(8)  |
| N102              | Cu1 | Dy1               | 124.78(9)  |  | O4   | Cl2  | O2   | 103.2(9)  |
| N102              | Cu1 | O104              | 100.41(13) |  | O4   | Cl2  | O3   | 110.5(4)  |
| N102              | Cu1 | N101              | 98.54(13)  |  | C8   | O1AA | O8   | 51.8(7)   |
| O204              | Cu2 | Dy1               | 44.58(7)   |  | C8   | O8   | O1AA | 45.0(7)   |
| O204              | Cu2 | N201              | 87.74(12)  |  | O1AA | C8   | O2AA | 167.6(16) |
| O204              | Cu2 | N202              | 171.80(13) |  | O1AA | C8   | O8   | 83.2(9)   |
| O209              | Cu2 | Dy1               | 43.25(8)   |  | O8   | C8   | O2AA | 95.3(13)  |

<sup>1</sup><sub>1-X,+Y,3/2-Z</sub>

**Table S15:** Bond Angles for **4** (La).

| Atom 1            | Atom 2 | Atom 3            | Angle/°     |  | Atom 1 | Atom 2 | Atom 3 | Angle/°    |
|-------------------|--------|-------------------|-------------|--|--------|--------|--------|------------|
| Cu1 <sup>1</sup>  | La1    | Cu1               | 152.71(2)   |  | O209   | Cu2    | La1    | 51.08(7)   |
| Cu2               | La1    | Cu1               | 84.575(16)  |  | O209   | Cu2    | O204   | 115.86(10) |
| Cu2 <sup>1</sup>  | La1    | Cu1 <sup>1</sup>  | 84.574(16)  |  | O209   | Cu2    | N31    | 169.08(12) |
| Cu2 <sup>1</sup>  | La1    | Cu1               | 103.010(15) |  | O209   | Cu2    | N35    | 86.21(11)  |
| Cu2               | La1    | Cu1 <sup>1</sup>  | 103.014(15) |  | N31    | Cu2    | La1    | 118.95(10) |
| Cu2               | La1    | Cu2 <sup>1</sup>  | 147.86(2)   |  | N31    | Cu2    | O204   | 73.37(12)  |
| O104              | La1    | Cu1               | 34.43(6)    |  | N35    | Cu2    | La1    | 122.43(9)  |
| O104 <sup>1</sup> | La1    | Cu1 <sup>1</sup>  | 34.43(6)    |  | N35    | Cu2    | O204   | 101.67(12) |
| O104 <sup>1</sup> | La1    | Cu1               | 165.37(6)   |  | N35    | Cu2    | N31    | 97.88(12)  |
| O104              | La1    | Cu1 <sup>1</sup>  | 165.38(6)   |  | Cu1    | O104   | La1    | 99.62(10)  |
| O104 <sup>1</sup> | La1    | Cu2               | 107.21(6)   |  | C104   | O104   | La1    | 147.4(2)   |
| O104              | La1    | Cu2 <sup>1</sup>  | 107.20(6)   |  | C104   | O104   | Cu1    | 109.6(2)   |
| O104 <sup>1</sup> | La1    | Cu2 <sup>1</sup>  | 62.40(6)    |  | Cu1    | O109   | La1    | 101.89(10) |
| O104              | La1    | Cu2               | 62.40(6)    |  | C109   | O109   | La1    | 145.8(2)   |
| O104 <sup>1</sup> | La1    | O104              | 144.78(12)  |  | C109   | O109   | Cu1    | 111.8(2)   |
| O104              | La1    | O205              | 83.76(8)    |  | C204   | O204   | Cu2    | 102.7(2)   |
| O104 <sup>1</sup> | La1    | O205 <sup>1</sup> | 83.76(8)    |  | Cu2    | O205   | La1    | 94.85(10)  |
| O104              | La1    | O205 <sup>1</sup> | 106.92(8)   |  | C205   | O205   | La1    | 129.6(2)   |
| O104 <sup>1</sup> | La1    | O205              | 106.93(8)   |  | C205   | O205   | Cu2    | 108.8(2)   |
| O104 <sup>1</sup> | La1    | O209              | 76.72(8)    |  | Cu2    | O209   | La1    | 93.01(9)   |
| O104 <sup>1</sup> | La1    | O209 <sup>1</sup> | 78.77(8)    |  | C209   | O209   | La1    | 128.9(2)   |
| O104              | La1    | O209              | 78.77(8)    |  | C209   | O209   | Cu2    | 110.3(2)   |
| O104              | La1    | O209 <sup>1</sup> | 76.72(8)    |  | C202   | N31    | Cu2    | 119.6(2)   |
| O109              | La1    | Cu1               | 33.68(6)    |  | C202   | N31    | C203   | 115.5(3)   |
| O109              | La1    | Cu1 <sup>1</sup>  | 119.03(6)   |  | C203   | N31    | Cu2    | 100.4(2)   |
| O109 <sup>1</sup> | La1    | Cu1               | 119.04(6)   |  | C207   | N35    | Cu2    | 114.9(2)   |
| O109 <sup>1</sup> | La1    | Cu1 <sup>1</sup>  | 33.68(6)    |  | C207   | N35    | C208   | 118.3(3)   |
| O109 <sup>1</sup> | La1    | Cu2 <sup>1</sup>  | 95.85(6)    |  | C208   | N35    | Cu2    | 107.5(2)   |
| O1091             | La1    | Cu2               | 107.77(6)   |  | C102   | N101   | Cu1    | 115.4(2)   |
| O109              | La1    | Cu2 <sup>1</sup>  | 107.76(6)   |  | C103   | N101   | Cu1    | 106.8(2)   |
| O109              | La1    | Cu2               | 95.85(6)    |  | C103   | N101   | C102   | 116.9(3)   |
| O109              | La1    | O104              | 66.40(8)    |  | C107   | N102   | Cu1    | 118.3(2)   |
| O109              | La1    | O104 <sup>1</sup> | 147.68(8)   |  | C107   | N102   | C108   | 114.9(3)   |
| O109 <sup>1</sup> | La1    | O104              | 147.68(8)   |  | C108   | N102   | Cu1    | 107.8(2)   |
| O109 <sup>1</sup> | La1    | O104 <sup>1</sup> | 66.40(8)    |  | O111   | C18    | C108   | 114.8(3)   |
| O109 <sup>1</sup> | La1    | O109              | 85.37(11)   |  | C107   | C101   | C102   | 114.1(3)   |
| O109              | La1    | O205              | 79.04(8)    |  | N101   | C102   | C101   | 111.2(3)   |
| O109 <sup>1</sup> | La1    | O205              | 75.33(8)    |  | N101   | C103   | C104   | 105.2(3)   |
| O109              | La1    | O205 <sup>1</sup> | 75.33(8)    |  | N101   | C103   | C105   | 111.1(3)   |
| O109 <sup>1</sup> | La1    | O205 <sup>1</sup> | 79.04(8)    |  | N101   | C103   | C106   | 112.0(3)   |
| O109 <sup>1</sup> | La1    | O209 <sup>1</sup> | 131.06(8)   |  | C105   | C103   | C104   | 111.4(3)   |
| O109 <sup>1</sup> | La1    | O209              | 111.99(8)   |  | C106   | C103   | C104   | 110.0(3)   |
| O109              | La1    | O209 <sup>1</sup> | 111.99(8)   |  | C106   | C103   | C105   | 107.3(3)   |
| O109              | La1    | O209              | 131.06(8)   |  | O104   | C104   | C103   | 112.7(3)   |
| O205 <sup>1</sup> | La1    | Cu1               | 84.14(6)    |  | O105   | C105   | C103   | 114.5(3)   |
| O205              | La1    | Cu1               | 87.70(6)    |  | O106   | C106   | C103   | 111.9(3)   |
| O205 <sup>1</sup> | La1    | Cu1 <sup>1</sup>  | 87.70(6)    |  | N102   | C107   | C101   | 111.8(3)   |



|                   |     |                   |            |  |      |      |      |          |
|-------------------|-----|-------------------|------------|--|------|------|------|----------|
| O205              | La1 | Cu1 <sup>1</sup>  | 84.14(6)   |  | N102 | C108 | C18  | 111.2(3) |
| O205 <sup>1</sup> | La1 | Cu2 <sup>1</sup>  | 35.57(6)   |  | N102 | C108 | C109 | 105.1(3) |
| O205              | La1 | Cu2               | 35.57(6)   |  | N102 | C108 | C110 | 110.8(3) |
| O205              | La1 | Cu2 <sup>1</sup>  | 168.64(6)  |  | C18  | C108 | C109 | 111.0(3) |
| O205 <sup>1</sup> | La1 | Cu2               | 168.63(6)  |  | C110 | C108 | C18  | 109.1(3) |
| O205              | La1 | O205 <sup>1</sup> | 144.90(12) |  | C110 | C108 | C109 | 109.7(3) |
| O205 <sup>1</sup> | La1 | O209 <sup>1</sup> | 63.44(8)   |  | O109 | C109 | C108 | 112.1(3) |
| O205              | La1 | O209              | 63.43(8)   |  | O110 | C110 | C108 | 111.6(3) |
| O205              | La1 | O209 <sup>1</sup> | 150.49(8)  |  | C207 | C201 | C202 | 115.4(3) |
| O205 <sup>1</sup> | La1 | O209              | 150.50(8)  |  | N31  | C202 | C201 | 111.8(3) |
| O209              | La1 | Cu1 <sup>1</sup>  | 88.48(5)   |  | N31  | C203 | C204 | 108.5(3) |
| O209              | La1 | Cu1               | 110.95(5)  |  | N31  | C203 | C205 | 104.1(3) |
| O209 <sup>1</sup> | La1 | Cu1 <sup>1</sup>  | 110.95(5)  |  | N31  | C203 | C206 | 115.5(3) |
| O209 <sup>1</sup> | La1 | Cu1               | 88.48(5)   |  | C205 | C203 | C204 | 111.1(3) |
| O209              | La1 | Cu2 <sup>1</sup>  | 114.93(6)  |  | C205 | C203 | C206 | 110.9(3) |
| O209 <sup>1</sup> | La1 | Cu2 <sup>1</sup>  | 35.91(5)   |  | C206 | C203 | C204 | 106.7(3) |
| O209 <sup>1</sup> | La1 | Cu2               | 114.93(6)  |  | O204 | C204 | C203 | 111.5(3) |
| O209              | La1 | Cu2               | 35.91(6)   |  | O205 | C205 | C203 | 110.3(3) |
| O209 <sup>1</sup> | La1 | O209              | 90.90(12)  |  | O206 | C206 | C203 | 116.1(3) |
| O104              | Cu1 | La1               | 45.95(7)   |  | N35  | C207 | C201 | 110.0(3) |
| O104              | Cu1 | N101              | 86.95(11)  |  | N35  | C208 | C209 | 104.5(3) |
| O104              | Cu1 | N102              | 173.28(12) |  | N35  | C208 | C210 | 109.7(3) |
| O109              | Cu1 | La1               | 44.43(7)   |  | N35  | C208 | C211 | 109.8(3) |
| O109              | Cu1 | O104              | 87.87(10)  |  | C209 | C208 | C211 | 110.3(3) |
| O109              | Cu1 | N101              | 173.64(12) |  | C210 | C208 | C209 | 110.7(3) |
| O109              | Cu1 | N102              | 86.16(11)  |  | C210 | C208 | C211 | 111.6(3) |
| N101              | Cu1 | La1               | 129.50(9)  |  | O209 | C209 | C208 | 112.2(3) |
| N101              | Cu1 | N102              | 99.20(12)  |  | O210 | C210 | C208 | 107.0(3) |
| N102              | Cu1 | La1               | 129.05(9)  |  | O211 | C211 | C208 | 110.6(3) |
| O204              | Cu2 | La1               | 129.21(7)  |  | O1   | Cl2  | O2   | 109.8(4) |
| O205              | Cu2 | La1               | 49.58(8)   |  | O1   | Cl2  | O3   | 107.4(7) |
| O205              | Cu2 | O204              | 85.67(11)  |  | O1   | Cl2  | O4   | 113.2(6) |
| O205              | Cu2 | O209              | 87.71(11)  |  | O2   | Cl2  | O3   | 112.0(7) |
| O205              | Cu2 | N31               | 87.22(12)  |  | O4   | Cl2  | O2   | 112.8(6) |
| O205              | Cu2 | N35               | 172.00(12) |  | O4   | Cl2  | O3   | 101.4(8) |

<sup>1</sup><sub>1-x,y,3/2-z</sub>

## References

- [1] a) D. Casanova, M. Llunell, P. Alemany and S. Alvarez, *Chem. -Eur. J.*, 2005, **11**, 1479-1494; b) M. Pinsky and D. Avnir, *Inorg. Chem.*, 1998, **37**, 5575.
- [2] J. Bartolomé, G. Filoti, V. Kuncser, G. Schinteie, V. Mereacre, C. E. Anson, A. K. Powell, D. Prodius and C. Turta, *Phys. Rev. B*, 2009, **80**, 014430.
- [3] S. Gao, O. Borgmeier and H. Lueken, *Acta Phys. Pol. A*, 1996, **90**, 393.
- [4] R. Gheorghe, P. Cucos, M. Andruh, J. -P. Costes, B. Donnadieu and S. Shova, *Chem.-Eur.J.*, 2006, **12**, 187.
- [5] A. N. Georgopoulou, R. Adam, C. P. Raptopoulou, V. Psycharis, R. Ballesteros, B. Abarca and A. K. Boudalis, *Dalton Trans.*, 2010, **39**, 5020.
- [6] I. Ramade, O. Kahn, Y. Jeannin and F. Robert, *Inorg. Chem.*, 1997, **36**, 930.
- [7] M. Sasaki, H. Horiuchi, M. Kumagai, M. Sakamoto, H. Sakiyama, Y. Nishida, Y. Sadaoka, M. Ohba and H. Okawa, *Chem.Lett.*, 1998, 911.
- [8] M. Ryazanov, V. Nikiforov, F. Lloret, M. Julve, N. Kuzmina and A. Gleizes, *Inorg. Chem.*, 2002, **41**, 1816.
- [9] M. Ryazanov, V. Nikiforov, F. Lloret, M. Julve, N. Kuzmina and A. Gleizes, *Inorg.Chem.*, 2002, **41**, 1816.
- [10] G. Cosquer, F. Pointillart, Y. L. Gal, S. Golhen, O. Cador and L. Ouahab, *Chem.-Eur.J.*, 2011, **17**, 12502.
- [11] O. Margeat, P. G. Lacroix, J. -P. Costes, B. Donnadieu, C. Lepetit and K. Nakatani, *Inorg.Chem.*, 2004, **43**, 4743.
- [12] I. Ramade, O. Kahn, Y. Jeannin and F. Robert, *Inorg.Chem.*, 1997, **36**, 930.
- [13] M. Ryazanov, V. Nikiforov, F. Lloret, M. Julve, N. Kuzmina and A. Gleizes, *Inorg.Chem.*, 2002, **41**, 1816.
- [14] C. Brewer, G. Brewer, W. R. Scheidt, M. Shang and E. E. Carpenter, *Inorg. Chim. Acta*, 2001, **313**, 65.
- [15] F. Avecilla, C. Platas-Iglesias, R. Rodriguez-Cortinas, G. Guillemot, J. -C. G. Bunzli, C. D. Brondino, C. F. G. C. Geraldes, A. d. Blas and T. Rodriguez-Blas, *J. Chem. Soc., Dalton Trans.*, 2002, 4658.
- [16] M. Towatari, K. Nishi, T. Fujinami, N. Matsumoto, Y. Sunatsuki, M. Kojima, N. Mochida, T. Ishida, N. Re and J. Mrozinski, *Inorg.Chem.*, 2013, **52**, 6160.
- [17] F. He, M.-L. Tong and X.-M. Chen, *Inorg.Chem.*, 2005, **44**, 8285.
- [18] J. -P. Costes, F. Dahan, A. Dupuis and J. -P. Laurent, *New J. Chem.*, 1998, **22**, 1525.
- [19] A. M. Atria, Y. Moreno, E. Spodine, M. T. Garland and R. Baggio, *Inorg. Chim. Acta*, 2002, **335**, 1.
- [20] M. L. Kahn, T. M. Rajendiran, Y. Jeannin, C. Mathoniere and O. Kahn, *C. R. Acad. Sci., Ser.IIc :Chim.*, 2000, **3**, 131.
- [21] G. Novitchi, S. Shova, A. Caneschi, J. -P. Costes, M. Gdaniec and N. Stanica, *Dalton Trans.*, 2004, 1194.
- [22] J. -P. Costes, F. Dahan, A. Dupuis and J. -P. Laurent, *Inorg.Chem.*, 1997, **36**, 3429.
- [23] M. Sarwar, A. M. Madalan, C. Tiseanu, G. Novitchi, C. Maxim, G. Marinescu, D. Luneau and M. Andruh, *New J. Chem.*, 2013, **37**, 2280.
- [24] J. -P. Costes, F. Dahan, G. Novitchi, V. Arion, S. Shova and J. Lipkowski, *Eur. J. Inorg. Chem.*, 2004, 1530.
- [25] G. Novitchi, J. -P. Costes and B. Donnadieu, *Eur. J. Inorg. Chem.*, 2004, 1808.
- [26] H. Kara, Y. Elerman and K. Prout, *Z. Naturforsch., B: Chem.Sci.*, 2000, **55**, 1131.
- [27] F. Z. C. Fellah, J. -P. Costes, C. Duhayon, J. -C. Daran and J. -P. Tuchagues, *Polyhedron*, 2010, **29**, 2111.
- [28] J. -P. Costes, F. Dahan, A. Dupuis and J. -P. Laurent, *Inorg. Chem.*, 1997, **36**, 3429.
- [29] J. -P. Costes, F. Dahan, A. Dupuis and J.-P. Laurent, *Inorg. Chem.*, 1996, **35**, 2400.

- [30] F. Z. C. Fellah, J. -P. Costes, C. Duhayon, J. -C. Daran and J. -P. Tuchagues, *Polyhedron*, 2010, **29**, 2111.
- [31] R. Gheorghe, M. Andruh, J. -P. Costes and B. Donnadieu, *Chem. Commun.*, 2003, 2778.
- [32] C. T. Zeyrek, A. Elmali and Y. Elerman, *J. Mol. Struct.*, 2005, **740**, 47.
- [33] A. Elmali and Y. Elerman, *Z. Naturforsch., B: Chem.Sci.*, 2004, **59**, 535.
- [34] S. Akine, T. Matsumoto, T. Taniguchi and T. Nabeshima, *Inorg. Chem.*, 2005, **44**, 3270.
- [35] S. Akine, T. Matsumoto, T. Taniguchi and T. Nabeshima, *Inorg. Chem.*, 2005, **44**, 3270.
- [36] B. Cristovao, J. Klak, B. Mirosław and L. Mazur, *Inorg. Chim. Acta*, 2011, **378**, 288.
- [37] S. Mohanta, H. -H. Lin, C. -J. Lee and H. -H. Wei, *Inorg. Chem. Commun.*, 2002, **5**, 585.
- [38] F. Z. C. Fellah, J. -P. Costes, F. Dahan, C. Duhayon, G. Novitchi, J. -P. Tuchagues and L. Vendier, *Inorg. Chem.*, 2008, **47**, 6444.
- [39] J. -P. Costes, B. Donnadieu, R. Gheorghe, G. Novitchi, J. -P. Tuchagues and L. Vendier, *Eur. J. Inorg. Chem.*, 2008, 5235.
- [40] J. -P. Costes, G. Novitchi, S. Shova, F. Dahan, B. Donnadieu and J. -P. Tuchagues, *Inorg. Chem.*, 2004, **43**, 7792.
- [41] W. -X. Zhang, Y. -Y. Yang, S. -B. Zai, S. W. Ng and X. -M. Chen, *Eur. J. Inorg. Chem.*, 2008, 679.
- [42] M. -G. Alexandru, D. Visinescu, A. M. Madalan, F. Lloret, M. Julve and M. Andruh, *Inorg. Chem.*, 2012, **51**, 4906.
- [43] J. -P. Costes, F. Dahan and A. Dupuis, *Inorg. Chem.*, 2000, **39**, 165.
- [44] R. Koner, G. -H. Lee, Y. Wang, H. -H. Wei and S. Mohanta, *Eur. J. Inorg. Chem.*, 2005, 1500.
- [45] L. Xu, Q. Zhang, G. Hou, P. Chen, G. Li, D. M. Pajerowski and C. L. Dennis, *Polyhedron*, 2013, **52**, 91.
- [46] R. Koner, G. -H. Lee, Y. Wang, H. -H. Wei and S. Mohanta, *Eur. J. Inorg. Chem.*, 2005, 1500.
